# Supplementary material
Source: publisher figshare collection journal article supplement (https://acs.figshare.com/ndownloader/files/4448851)
Supplement: Supplementary file 1 [file 4448851]

**Synthesis of All-Carbon, Quaternary Center-Containing  
Cyclohexenones through an Organocatalyzed, Multi-  
Component Coupling**

**Hua Yang and Rich G. Carter\***

*Department of Chemistry, Oregon State University, Corvallis, OR 97331.*

---

**Electronic Supplementary Information: HPLC Traces**

---

**Synthesis of All-Carbon, Quaternary Center-Containing  
Cyclohexenones through an Organocatalyzed, Multi-Component  
Coupling: HPLC Traces**

**Table of Contents**

| Compound<br># | Page<br>Number |
|---------------|----------------|
| <b>20</b>     | S88            |
| <b>35a</b>    | S90            |
| <b>35b</b>    | S92            |
| <b>35c</b>    | S94            |
| <b>35d</b>    | S96            |
| <b>35e</b>    | S98            |
| <b>35f</b>    | S100           |
| <b>38</b>     | S102           |
| <b>39</b>     | S104           |
| <b>44</b>     | S106           |
| <b>45</b>     | S108           |
| <b>46</b>     | S110           |
| <b>47</b>     | S112           |
| <b>53</b>     | S114           |
| <b>54</b>     | S116           |
| <b>55</b>     | S118           |
| <b>56</b>     | S120           |
| <b>57</b>     | S122           |
| <b>60</b>     | S124           |
| <b>61</b>     | S126           |

Please note that racemic mixtures (denoted as mixture on trace page) were generated by mixing of enantiomeric products generated from individual experiments using D- and L-forms of catalyst **25**.

=====

|                 |                                                         |            |          |
|-----------------|---------------------------------------------------------|------------|----------|
| Acq. Operator   | : Hua                                                   | Seq. Line  | : 1      |
| Acq. Instrument | : Instrument 1                                          | Location   | : Vial 1 |
| Injection Date  | : 10/5/2009 2:45:56 PM                                  | Inj        | : 1      |
|                 |                                                         | Inj Volume | : 5 µl   |
| Acq. Method     | : C:\CHEM32\1\METHODS\HG129.M\MSI83.M                   |            |          |
| Last changed    | : 10/5/2009 1:13:01 PM by Hua                           |            |          |
| Analysis Method | : C:\CHEM32\1\METHODS\HUA.M                             |            |          |
| Last changed    | : 3/15/2010 7:17:02 PM by CHAO                          |            |          |
|                 | (modified after loading)                                |            |          |
| Method Info     | : ADanalytical column, 1.0 mL/min, 254 nm, IPA:HEX10:90 |            |          |

=====

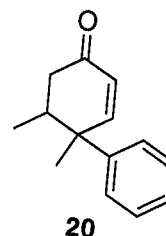

(mixture)

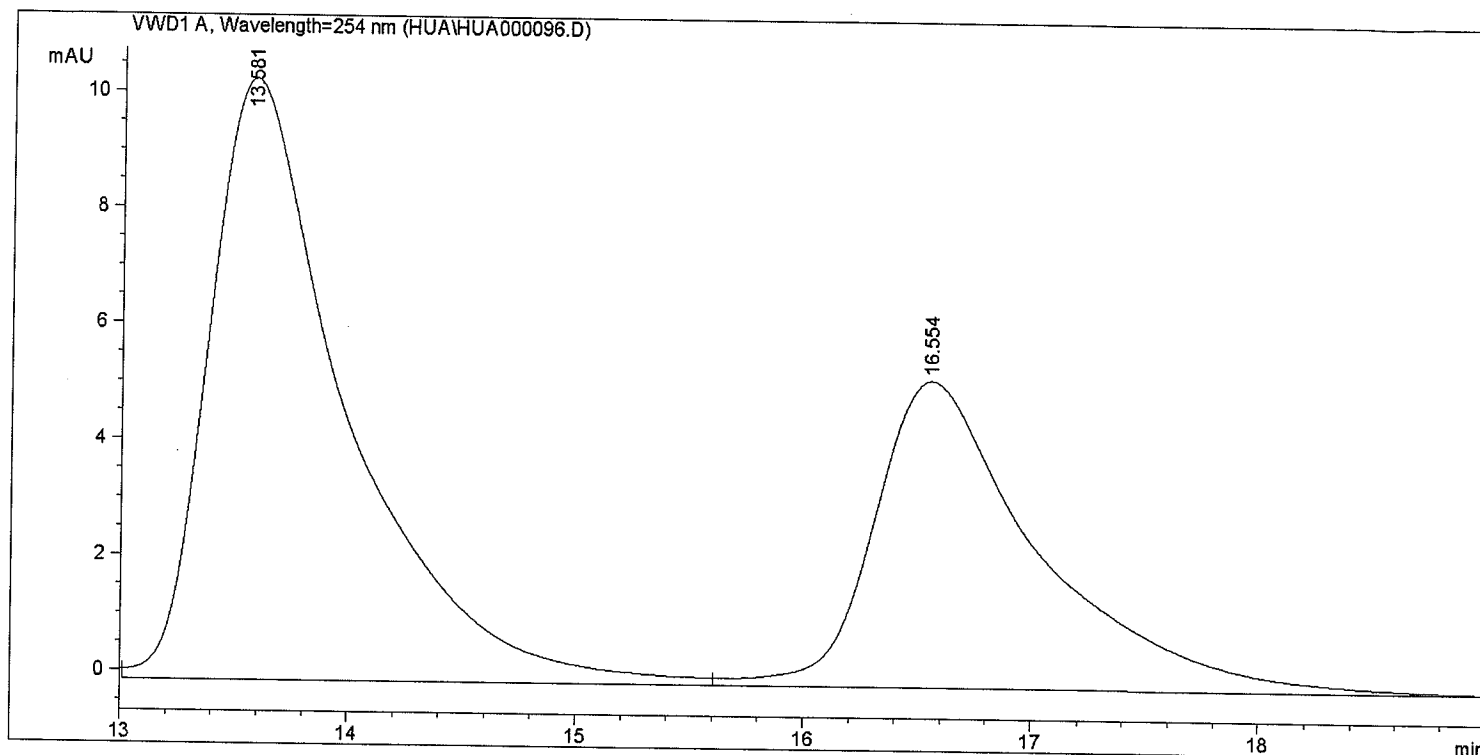

=====

Fraction Information

=====

Fraction collection off

=====

No Fractions found.

=====

Area Percent Report

=====

Sorted By : Signal  
Multiplier : 1.0000  
Dilution : 1.0000  
Use Multiplier & Dilution Factor with ISTDs

Signal 1: VWD1 A, Wavelength=254 nm

| Peak # | RetTime [min] | Type | Width [min] | Area mAU  | Area %  | Height [mAU] |
|--------|---------------|------|-------------|-----------|---------|--------------|
| 1      | 13.581        | VV   | 0.6158      | 439.66168 | 61.8735 | 10.39433     |
| 2      | 16.554        | VBA  | 0.7351      | 270.91965 | 38.1265 | 5.30925      |

Sample Name: 14-19

```

=====
Acq. Operator   : Hua                      Seq. Line :    1
Acq. Instrument : Instrument 1             Location  : Vial 1
Injection Date  : 10/4/2009 3:48:51 PM    Inj       :    1
                                           Inj Volume: 5 µl
Acq. Method     : C:\CHEM32\1\METHODS\HG129.M\MSI83.M
Last changed    : 10/4/2009 3:24:09 PM by Hua
Analysis Method : C:\CHEM32\1\METHODS\HUA.M
Last changed    : 3/15/2010 7:21:11 PM by CHAO
                  (modified after loading)
Method Info     : ADanalytical column, 1.0 mL/min, 254 nm, IPA:HEX10:90
=====

```

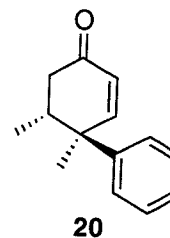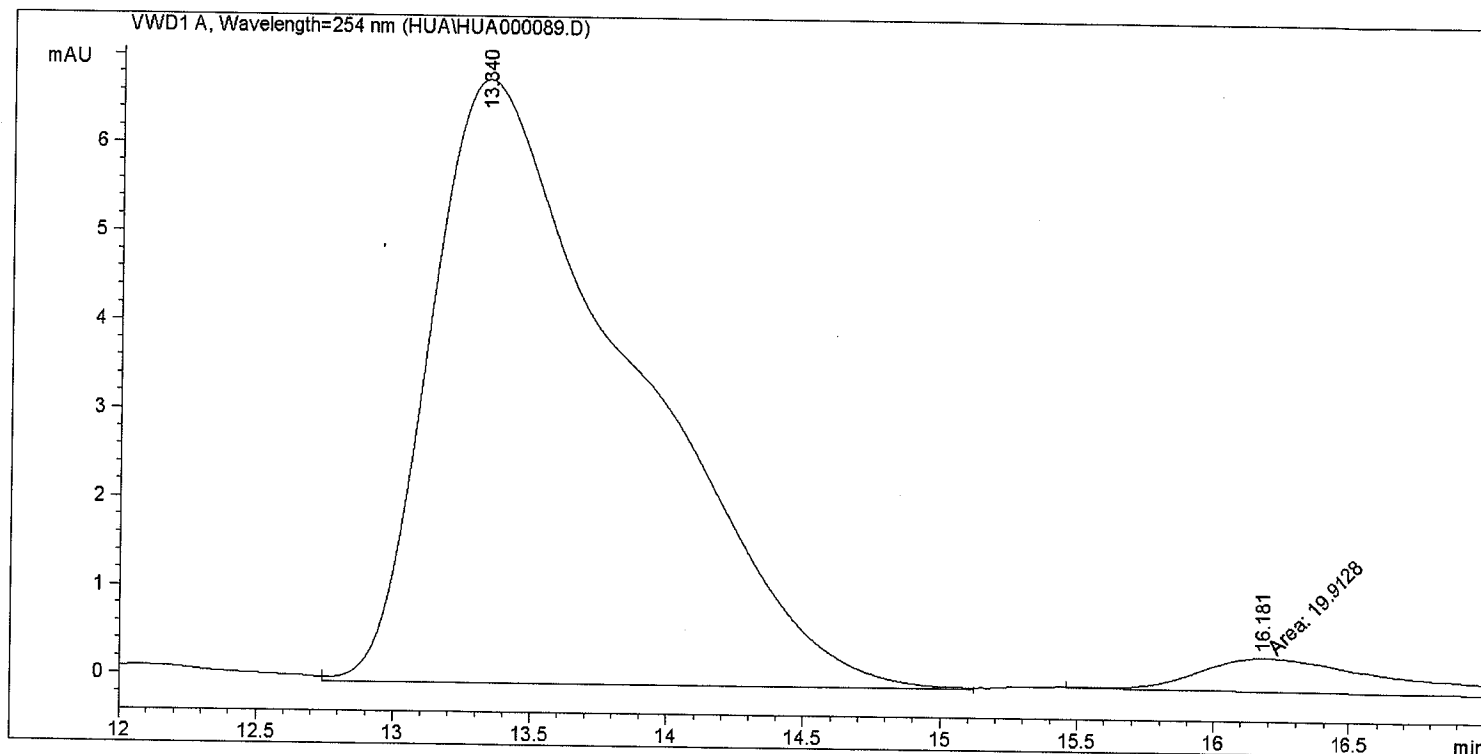

```

=====
Fraction Information
=====

```

```

=====
Fraction collection off
=====

```

```

=====
No Fractions found.
=====

```

```

=====
Area Percent Report
=====

```

```

Sorted By      : Signal
Multiplier     : 1.0000
Dilution       : 1.0000
Use Multiplier & Dilution Factor with ISTDs

```

Signal 1: VWD1 A, Wavelength=254 nm

| Peak # | RetTime [min] | Type | Width [min] | Area mAU  | Area *s | Height [mAU] | Area %  |
|--------|---------------|------|-------------|-----------|---------|--------------|---------|
| 1      | 13.340        | VV   | 0.7263      | 349.69150 |         | 6.81992      | 94.6124 |
| 2      | 16.181        | MM   | 0.8680      | 19.91276  |         | 3.82342e-1   | 5.3876  |

Sample Name: 14-68 mix

```

=====
Acq. Operator   : HUA                      Seq. Line :    1
Acq. Instrument : Instrument 1              Location  : Vial 1
Injection Date  : 11/9/2009 2:47:15 PM      Inj       :    1
                                           Inj Volume: 5 µl

Acq. Method     : C:\CHEM32\1\METHODS\022008CW.M
Last changed    : 11/9/2009 2:45:05 PM by HUA
Analysis Method : C:\CHEM32\1\METHODS\HUA.M
Last changed    : 3/15/2010 7:22:28 PM by CHAO
                  (modified after loading)

Method Info     : ADanalytical column, 1.0 mL/min, 254 nm, IPA:HEX10:90
=====

```

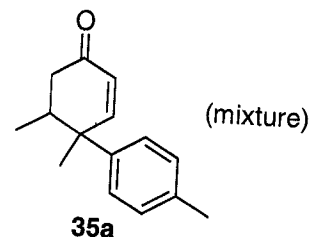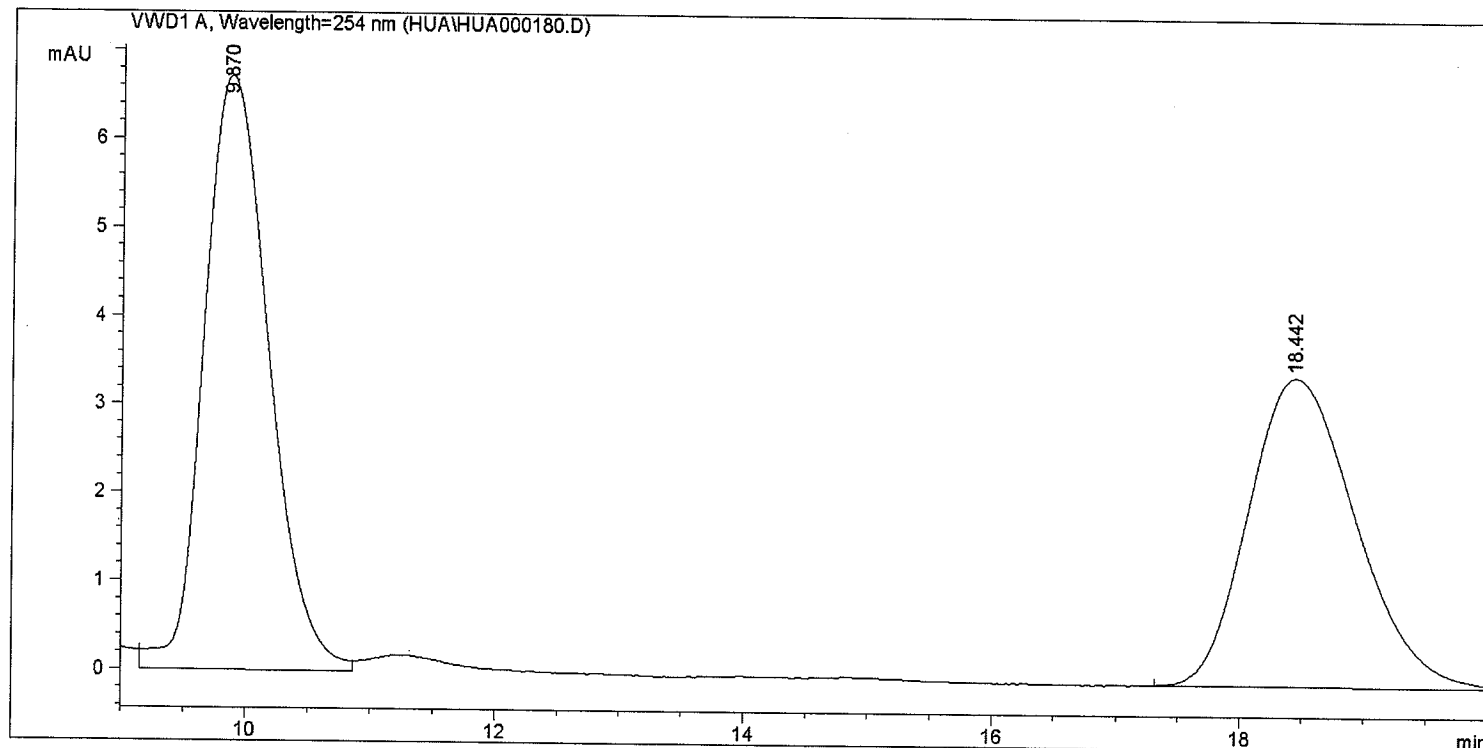

```

=====
Fraction Information
=====

```

Fraction collection off

No Fractions found.

```

=====
Area Percent Report
=====

```

```

Sorted By      : Signal
Multiplier     : 1.0000
Dilution       : 1.0000
Use Multiplier & Dilution Factor with ISTDs

```

Signal 1: VWD1 A, Wavelength=254 nm

| Peak # | RetTime [min] | Type | Width [min] | Area mAU *s | Height [mAU] | Area %  |
|--------|---------------|------|-------------|-------------|--------------|---------|
| 1      | 9.870         | VV   | 0.5708      | 244.89981   | 6.71901      | 53.8869 |
| 2      | 18.442        | BBA  | 0.9398      | 209.57021   | 3.48761      | 46.1131 |

```
=====
Acq. Operator   : HUA                      Seq. Line :    1
Acq. Instrument : Instrument 1              Location  : Vial 1
Injection Date  : 11/9/2009 3:17:00 PM      Inj       :    1
                                           Inj Volume: 5 µl

Acq. Method     : C:\CHEM32\1\METHODS\022008CW.M
Last changed    : 11/9/2009 2:45:05 PM by HUA
Analysis Method : C:\CHEM32\1\METHODS\HUA.M
Last changed    : 3/15/2010 7:23:39 PM by CHAO
                  (modified after loading)

Method Info     : ADanalytical column, 1.0 mL/min, 254 nm, IPA:HEX10:90
=====
```

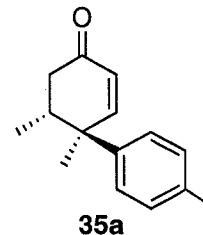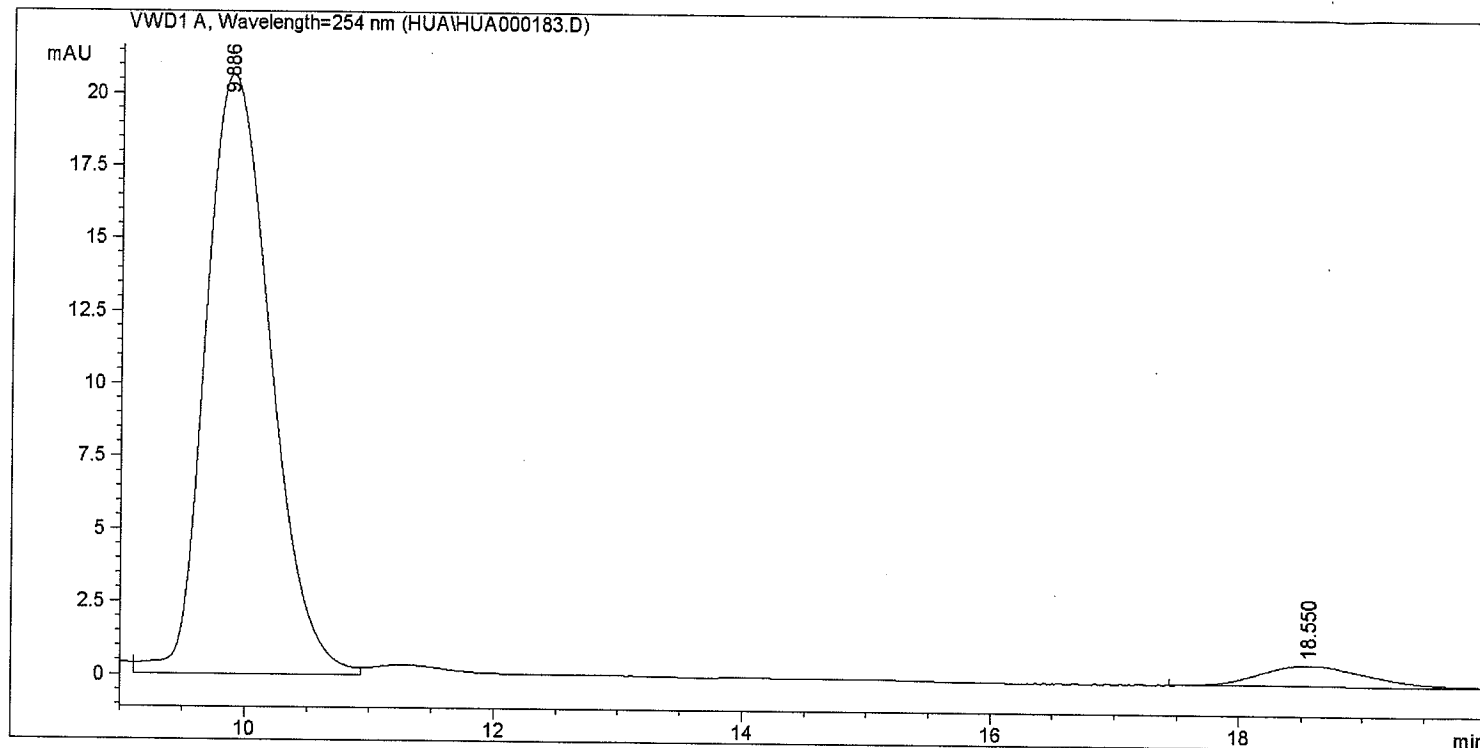

=====  
Fraction Information  
=====

Fraction collection off  
=====

No Fractions found.  
=====

=====  
Area Percent Report  
=====

Sorted By : Signal  
Multiplier : 1.0000  
Dilution : 1.0000  
Use Multiplier & Dilution Factor with ISTDs

Signal 1: VWD1 A, Wavelength=254 nm

| Peak # | RetTime [min] | Type | Width [min] | Area mAU *s | Height [mAU] | Area %  |
|--------|---------------|------|-------------|-------------|--------------|---------|
| 1      | 9.886         | VV   | 0.5732      | 745.82483   | 20.62910     | 94.4036 |
| 2      | 18.550        | BBA  | 0.9160      | 44.21366    | 7.18462e-1   | 5.5964  |

Sample Name: 14-49 mix

=====

|                 |                                                         |            |          |
|-----------------|---------------------------------------------------------|------------|----------|
| Acq. Operator   | : HUA                                                   | Seq. Line  | : 1      |
| Acq. Instrument | : Instrument 1                                          | Location   | : Vial 1 |
| Injection Date  | : 10/25/2009 3:01:55 PM                                 | Inj        | : 1      |
|                 |                                                         | Inj Volume | : 5 µl   |
| Acq. Method     | : C:\CHEM32\1\METHODS\022008CW.M                        |            |          |
| Last changed    | : 10/25/2009 2:00:29 PM by HUA                          |            |          |
| Analysis Method | : C:\CHEM32\1\METHODS\HUA.M                             |            |          |
| Last changed    | : 3/15/2010 7:24:57 PM by CHAO                          |            |          |
|                 | (modified after loading)                                |            |          |
| Method Info     | : ADanalytical column, 1.0 mL/min, 254 nm, IPA:HEX10:90 |            |          |

=====

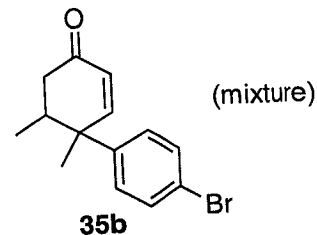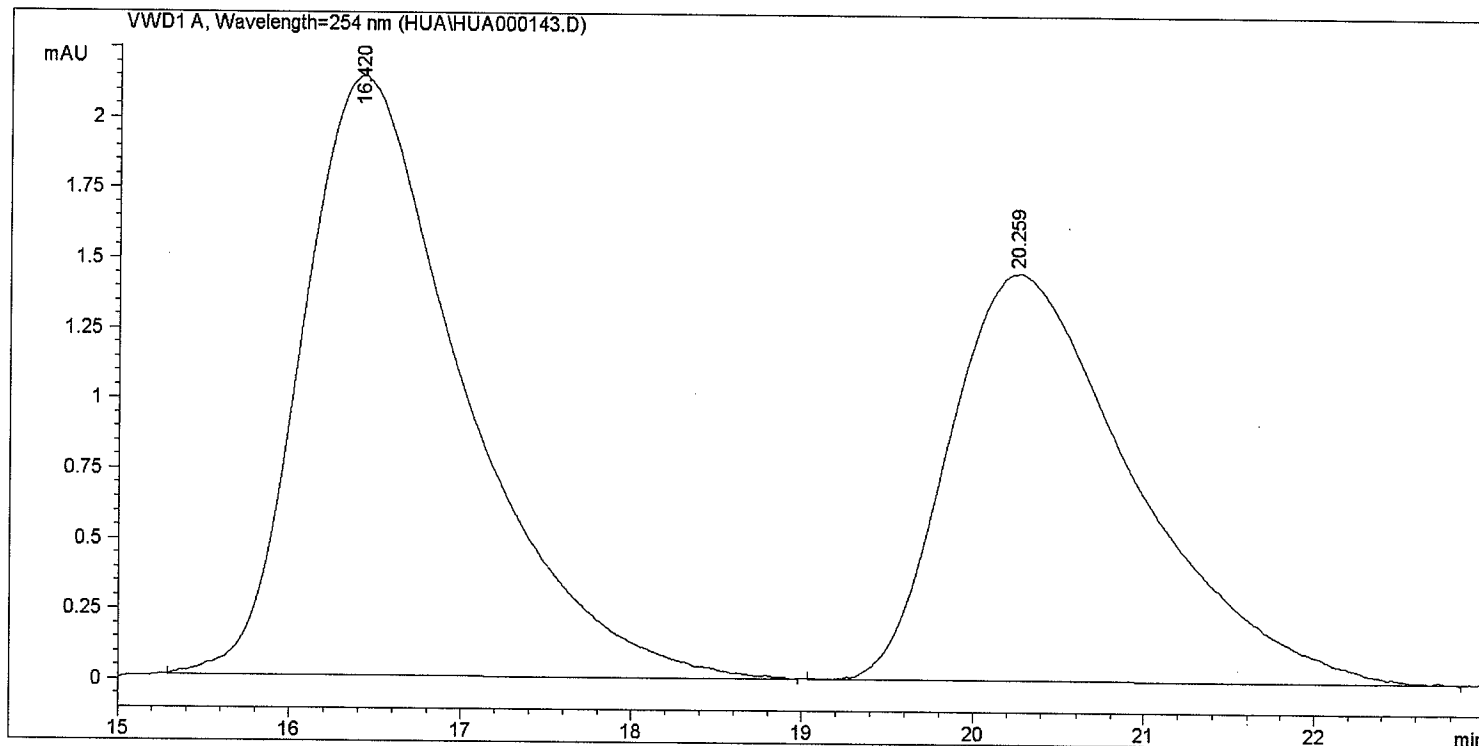

=====

Fraction Information

=====

Fraction collection off

No Fractions found.

=====

Area Percent Report

=====

Sorted By : Signal  
Multiplier : 1.0000  
Dilution : 1.0000  
Use Multiplier & Dilution Factor with ISTDs

Signal 1: VWD1 A, Wavelength=254 nm

| Peak # | RetTime [min] | Type | Width [min] | Area mAU *s | Height [mAU] | Area %  |
|--------|---------------|------|-------------|-------------|--------------|---------|
| 1      | 16.420        | BB   | 0.9734      | 139.76315   | 2.13506      | 56.1290 |
| 2      | 20.259        | BB   | 1.1465      | 109.24050   | 1.45064      | 43.8710 |

=====

|                 |                                                         |            |          |
|-----------------|---------------------------------------------------------|------------|----------|
| Acq. Operator   | : HUA                                                   | Seq. Line  | : 1      |
| Acq. Instrument | : Instrument 1                                          | Location   | : Vial 1 |
| Injection Date  | : 10/25/2009 2:02:52 PM                                 | Inj        | : 1      |
|                 |                                                         | Inj Volume | : 5 µl   |
| Acq. Method     | : C:\CHEM32\1\METHODS\022008CW.M                        |            |          |
| Last changed    | : 10/25/2009 2:00:29 PM by HUA                          |            |          |
| Analysis Method | : C:\CHEM32\1\METHODS\HUA.M                             |            |          |
| Last changed    | : 3/15/2010 7:26:22 PM by CHAO                          |            |          |
|                 | (modified after loading)                                |            |          |
| Method Info     | : ADanalytical column, 1.0 mL/min, 254 nm, IPA:HEX10:90 |            |          |

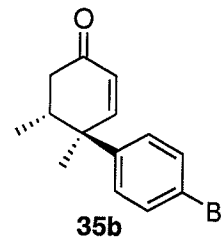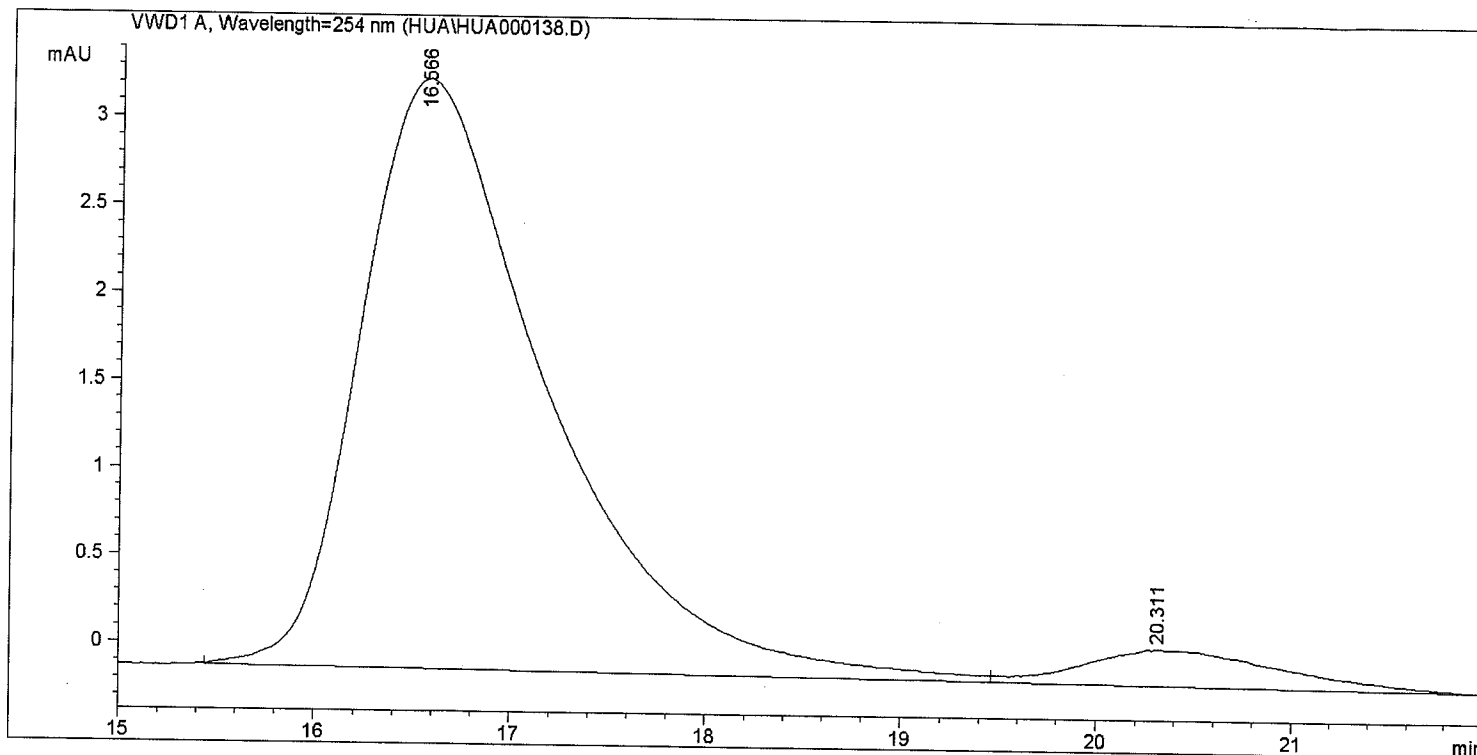

=====

Fraction Information

=====

Fraction collection off

No Fractions found.

=====

Area Percent Report

=====

Sorted By : Signal  
Multiplier : 1.0000  
Dilution : 1.0000  
Use Multiplier & Dilution Factor with ISTDs

Signal 1: VWD1 A, Wavelength=254 nm

| Peak # | RetTime [min] | Type | Width [min] | Area mAU  | Area %  | Height [mAU] |
|--------|---------------|------|-------------|-----------|---------|--------------|
| 1      | 16.566        | BV   | 0.9814      | 224.63278 | 93.6499 | 3.37030      |
| 2      | 20.311        | VBA  | 0.8964      | 15.23167  | 6.3501  | 2.09105e-1   |



```
=====
Acq. Operator   : HUA                      Seq. Line :    1
Acq. Instrument : Instrument 1              Location  : Vial
Injection Date  : 11/8/2009 8:05:00 PM      Inj       :    1
                                           Inj Volume: 5 µl

Acq. Method     : C:\CHEM32\1\METHODS\022008CW.M
Last changed    : 11/8/2009 8:02:43 PM by HUA
Analysis Method : C:\CHEM32\1\METHODS\HUA.M
Last changed    : 3/15/2010 7:27:43 PM by CHAO
                  (modified after loading)

Method Info     : ADanalytical column, 1.0 mL/min, 254 nm, IPA:HEX
=====
```

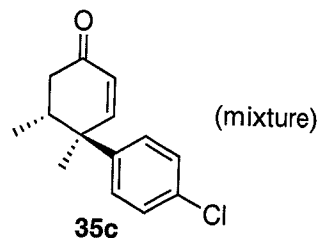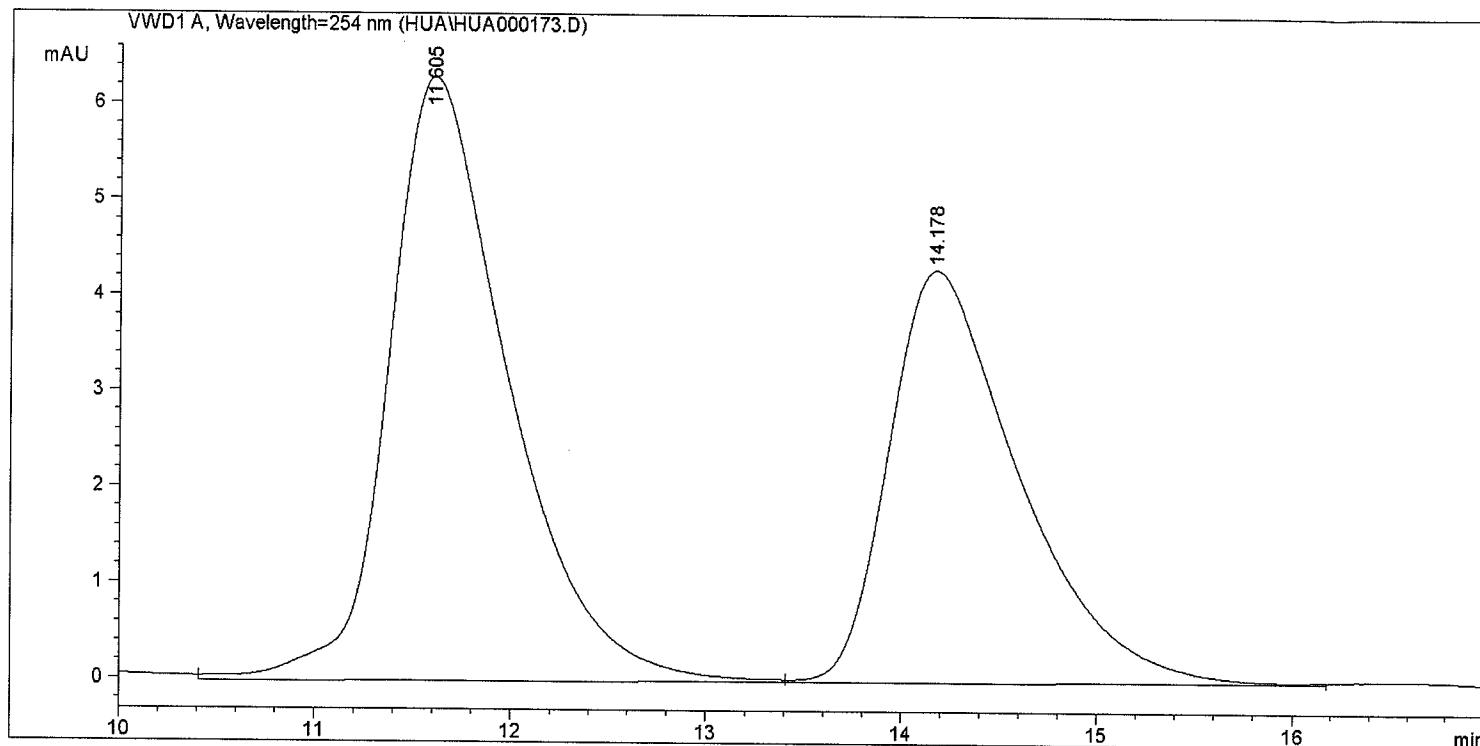

=====  
Fraction Information  
=====

Fraction collection off  
=====

No Fractions found.  
=====

=====  
Area Percent Report  
=====

```
Sorted By      :      Signal
Multiplier     :      1.0000
Dilution       :      1.0000
Use Multiplier & Dilution Factor with ISTDs
```

Signal 1: VWD1 A, Wavelength=254 nm

| Peak # | RetTime [min] | Type | Width [min] | Area mAU*s | Height [mAU] | Area %  |
|--------|---------------|------|-------------|------------|--------------|---------|
| 1      | 11.605        | VV   | 0.6300      | 268.10355  | 6.30592      | 57.2882 |
| 2      | 14.178        | VB   | 0.6936      | 199.88745  | 4.30113      | 42.7118 |

Sample Name: 14-66

```
=====
Acq. Operator   : HUA                               Seq. Line :    1
Acq. Instrument : Instrument 1                       Location  : Vial 1
Injection Date  : 11/8/2009 8:36:43 PM              Inj       :    1
                                                    Inj Volume: 5 µl

Acq. Method     : C:\CHEM32\1\METHODS\022008CW.M
Last changed    : 11/8/2009 8:02:43 PM by HUA
Analysis Method : C:\CHEM32\1\METHODS\HUA.M
Last changed    : 3/15/2010 7:29:21 PM by CHAO
                  (modified after loading)

Method Info     : ADanalytical column, 1.0 mL/min, 254 nm, IPA:HEX10:90
=====
```

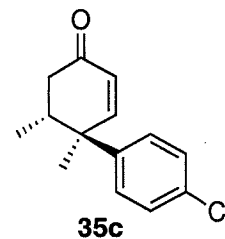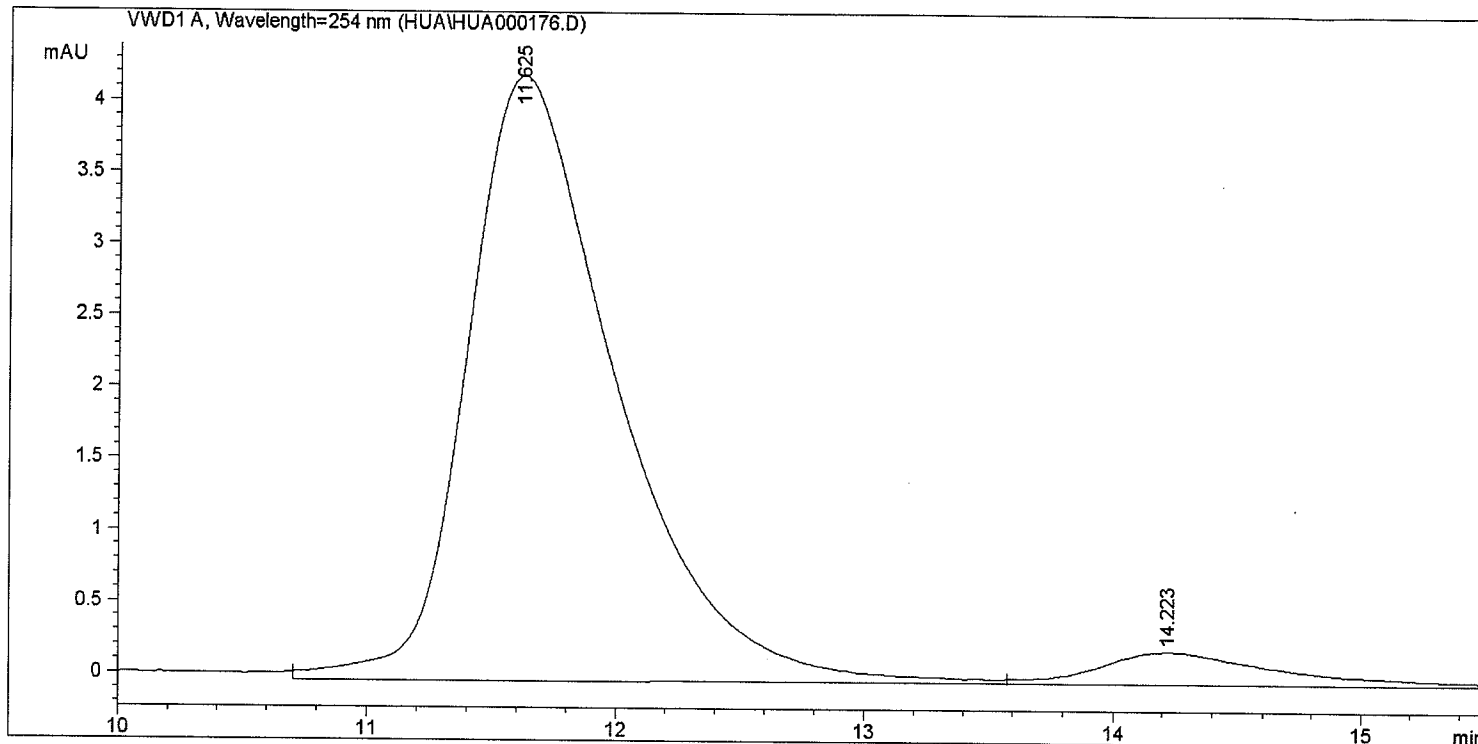

=====  
Fraction Information  
=====

Fraction collection off

No Fractions found.  
=====

=====  
Area Percent Report  
=====

```
Sorted By      :      Signal
Multiplier     :      1.0000
Dilution       :      1.0000
Use Multiplier & Dilution Factor with ISTDs
```

Signal 1: VWD1 A, Wavelength=254 nm

| Peak # | RetTime [min] | Type | Width [min] | Area mAU *s | Height [mAU] | Area %  |
|--------|---------------|------|-------------|-------------|--------------|---------|
| 1      | 11.625        | BB   | 0.6246      | 178.03656   | 4.23317      | 93.5549 |
| 2      | 14.223        | BBA  | 0.7505      | 12.26510    | 2.32080e-1   | 6.4451  |

Sample Name: 14-45 mix

```

=====
Acq. Operator   : Hua                      Seq. Line : 1
Acq. Instrument : Instrument 1             Location  : Via
Injection Date  : 10/21/2009 1:07:56 PM   Inj       : 1
                                           Inj Volume: 5 µl
Acq. Method     : C:\CHEM32\1\METHODS\022008CW.M
Last changed    : 10/21/2009 1:06:03 PM by Hua
Analysis Method : C:\CHEM32\1\METHODS\HUA.M
Last changed    : 3/15/2010 7:30:28 PM by CHAO
                  (modified after loading)
Method Info     : ADanalytical column, 1.0 mL/min, 254 nm, IPA:HEX10:90
=====

```

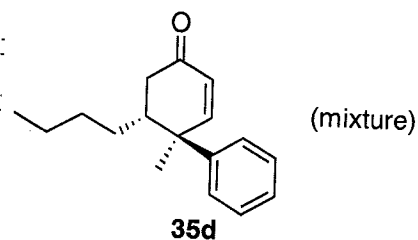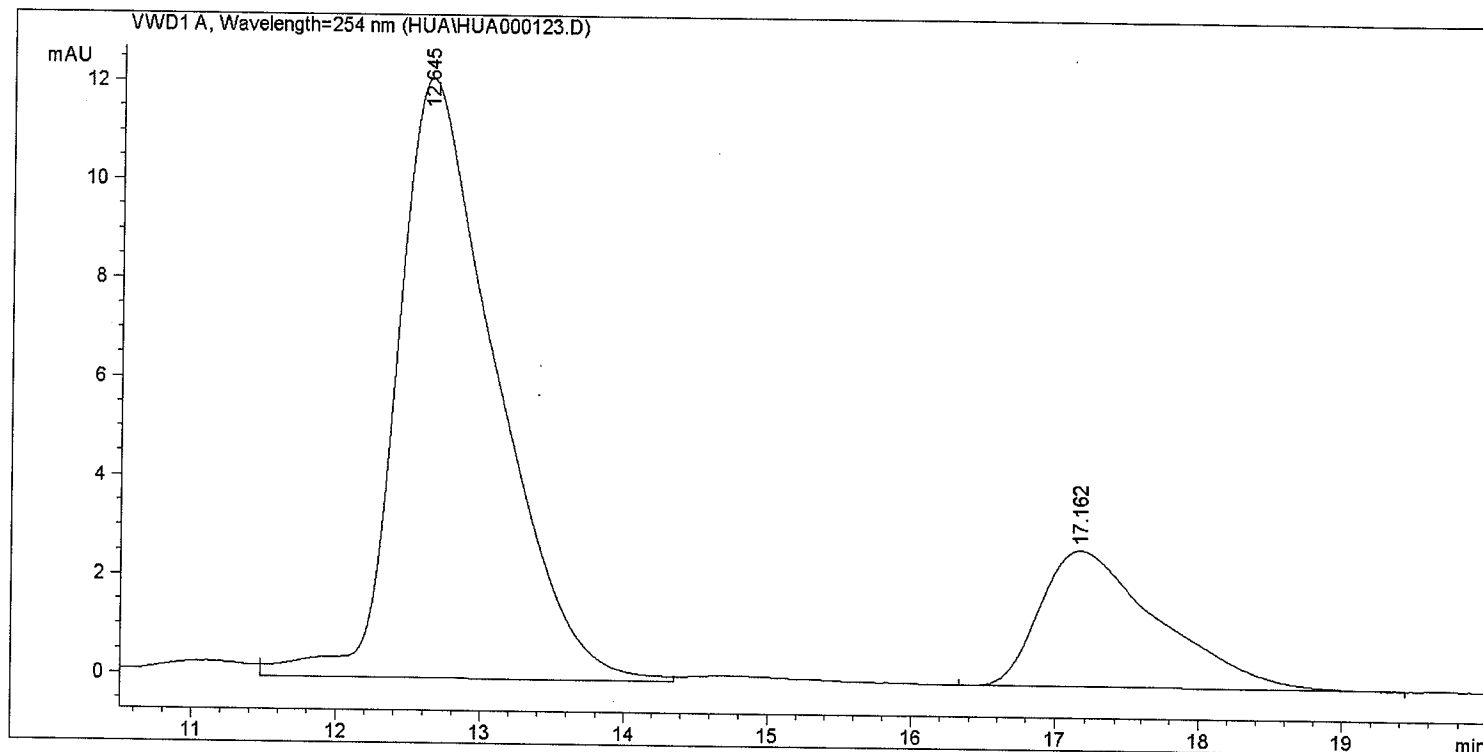

```

=====
Fraction Information
=====

```

```

Fraction collection off
=====

```

```

No Fractions found.
=====

```

```

=====
Area Percent Report
=====

```

```

Sorted By      : Signal
Multiplier     : 1.0000
Dilution       : 1.0000
Use Multiplier & Dilution Factor with ISTDs

```

Signal 1: VWD1 A, Wavelength=254 nm

| Peak # | RetTime [min] | Type | Width [min] | Area mAU  | Area %  | Height [mAU] |
|--------|---------------|------|-------------|-----------|---------|--------------|
| 1      | 12.645        | VV   | 0.6870      | 576.06317 | 78.3915 | 12.15295     |
| 2      | 17.162        | VB   | 0.8334      | 158.79095 | 21.6085 | 2.76386      |

```
=====
Acq. Operator   : Hua                      Seq. Line :    1
Acq. Instrument : Instrument 1             Location  : Vial-1
Injection Date  : 10/21/2009 2:05:50 PM    Inj       :    1
                                           Inj Volume: 5 µl
Acq. Method     : C:\CHEM32\1\METHODS\022008CW.M
Last changed    : 10/21/2009 1:06:03 PM by Hua
Analysis Method : C:\CHEM32\1\METHODS\HUA.M
Last changed    : 3/15/2010 7:32:54 PM by CHAO
                  (modified after loading)
Method Info     : ADanalytical column, 1.0 mL/min, 254 nm, IPA:HEX10:90
=====
```

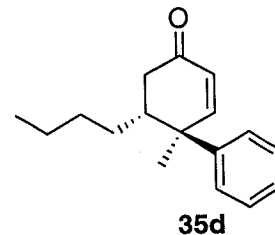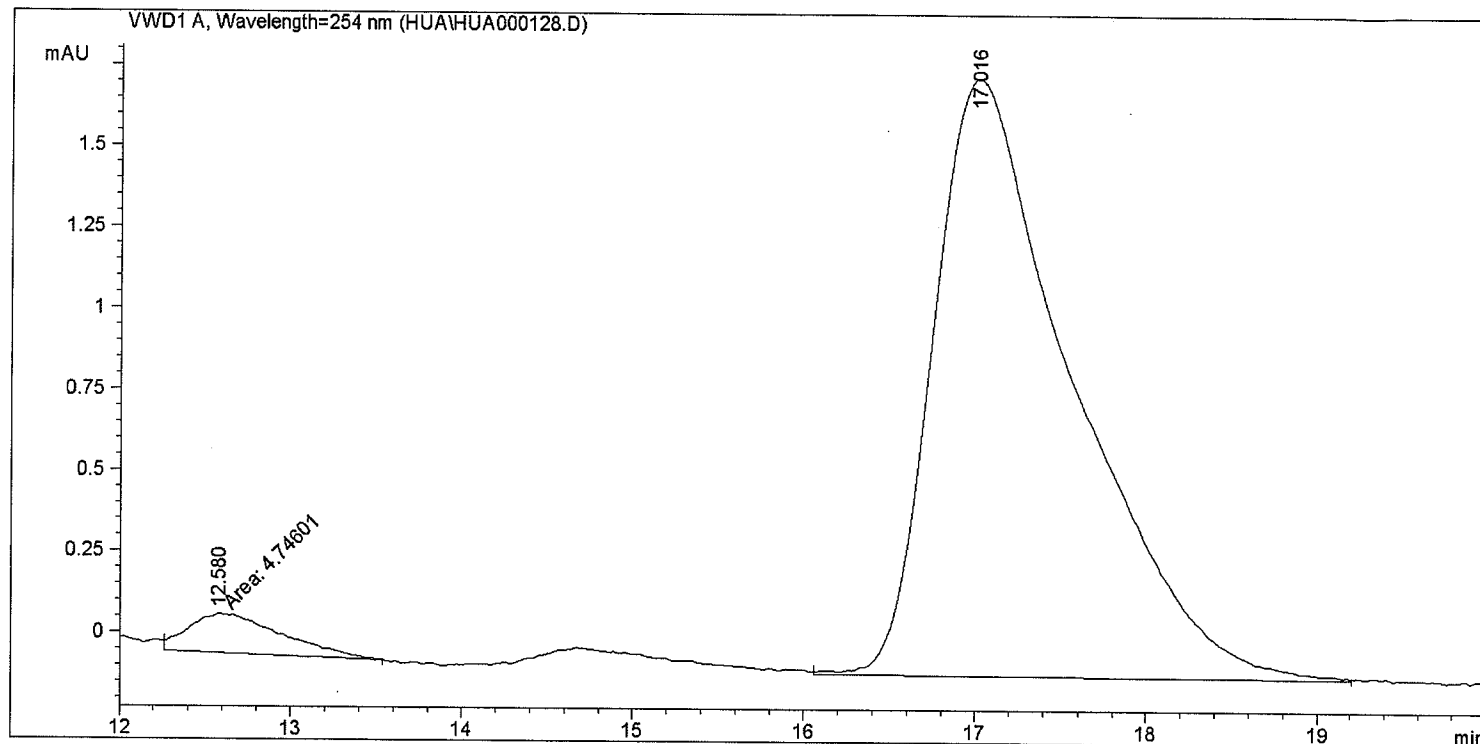

=====  
Fraction Information  
=====

Fraction collection off  
=====

No Fractions found.  
=====

=====  
Area Percent Report  
=====

```
Sorted By      :      Signal
Multiplier     :      1.0000
Dilution       :      1.0000
Use Multiplier & Dilution Factor with ISTDs
```

Signal 1: VWD1 A, Wavelength=254 nm

| Peak # | RetTime [min] | Type | Width [min] | Area mAU*s | Height [mAU] | Area %  |
|--------|---------------|------|-------------|------------|--------------|---------|
| 1      | 12.580        | MM   | 0.6428      | 4.74601    | 1.23059e-1   | 4.3415  |
| 2      | 17.016        | VB   | 0.8201      | 104.57047  | 1.84049      | 95.6585 |

=====

|                 |                                                         |            |   |
|-----------------|---------------------------------------------------------|------------|---|
| Acq. Operator   | : HUA                                                   | Seq. Line  | : |
| Acq. Instrument | : Instrument 1                                          | Location   | : |
| Injection Date  | : 11/13/2009 5:57:39 PM                                 | Inj        | : |
|                 |                                                         | Inj Volume | : |
| Acq. Method     | : C:\CHEM32\1\METHODS\022008CW.M                        |            |   |
| Last changed    | : 11/13/2009 5:55:38 PM by HUA                          |            |   |
| Analysis Method | : C:\CHEM32\1\METHODS\HUA.M                             |            |   |
| Last changed    | : 3/15/2010 7:35:03 PM by CHAO                          |            |   |
|                 | (modified after loading)                                |            |   |
| Method Info     | : ADanalytical column, 1.0 mL/min, 254 nm, IPA:HEX10:90 |            |   |

=====

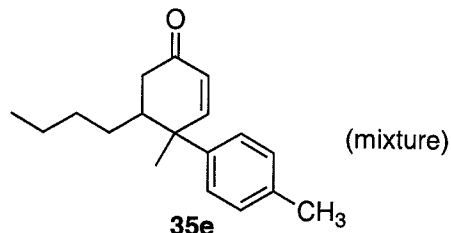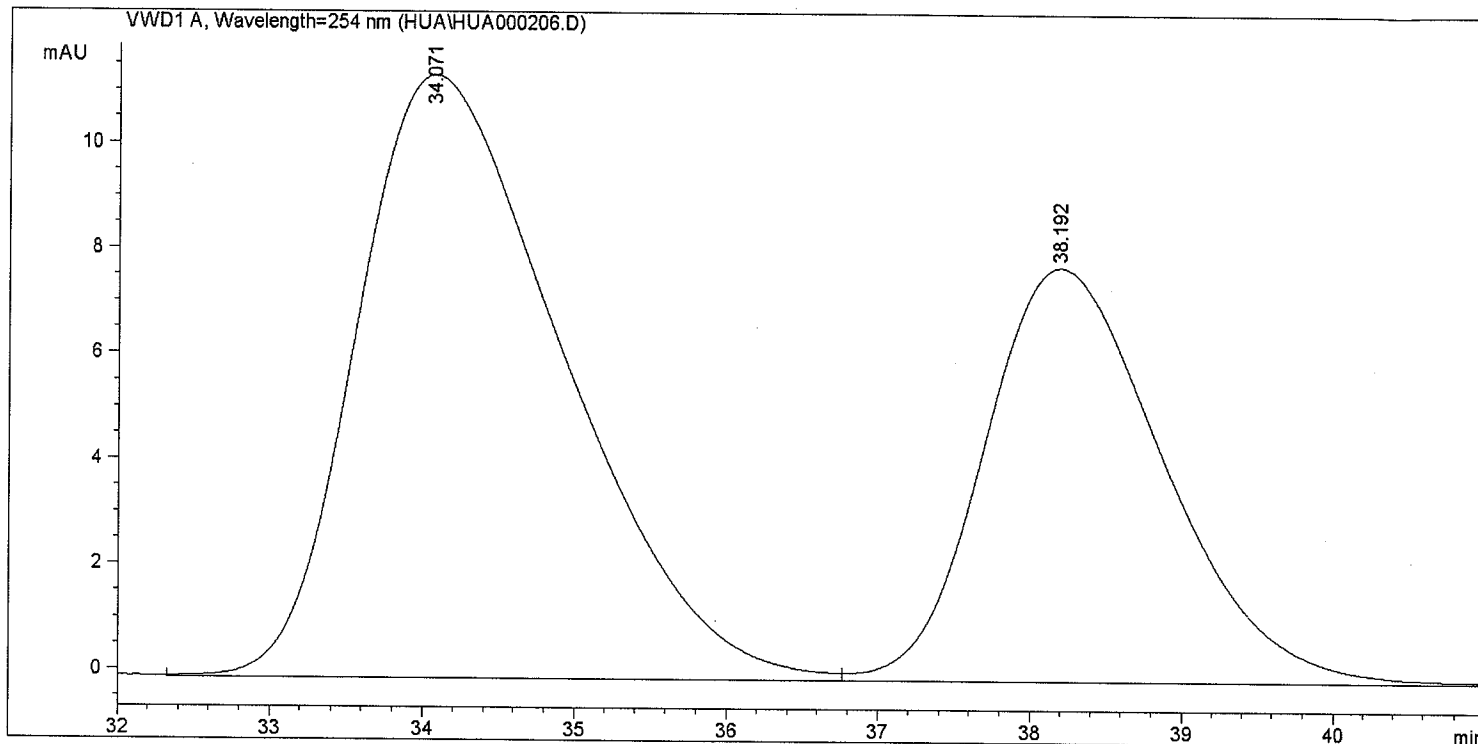

=====

Fraction Information

=====

Fraction collection off

=====

No Fractions found.

=====

Area Percent Report

=====

Sorted By : Signal  
Multiplier : 1.0000  
Dilution : 1.0000  
Use Multiplier & Dilution Factor with ISTDs

Signal 1: VWD1 A, Wavelength=254 nm

| Peak # | RetTime [min] | Type | Width [min] | Area mAU   | Height [mAU] | Area %  |
|--------|---------------|------|-------------|------------|--------------|---------|
| 1      | 34.071        | VV   | 1.4340      | 1082.38135 | 11.45858     | 62.4364 |
| 2      | 38.192        | VB   | 1.2800      | 651.19427  | 7.86897      | 37.5636 |

```
=====
Acq. Operator   : HUA                      Seq. Line :    1
Acq. Instrument : Instrument 1              Location  : Vial
Injection Date  : 11/13/2009 8:47:25 PM    Inj       :    1
                                           Inj Volume: 5 µl

Acq. Method     : C:\CHEM32\1\METHODS\022008CW.M
Last changed    : 11/13/2009 5:55:38 PM by HUA
Analysis Method : C:\CHEM32\1\METHODS\HUA.M
Last changed    : 3/15/2010 7:36:26 PM by CHAO
                  (modified after loading)

Method Info     : ADanalytical column, 1.0 mL/min, 254 nm, IPA:HE
=====
```

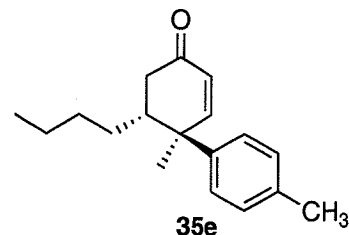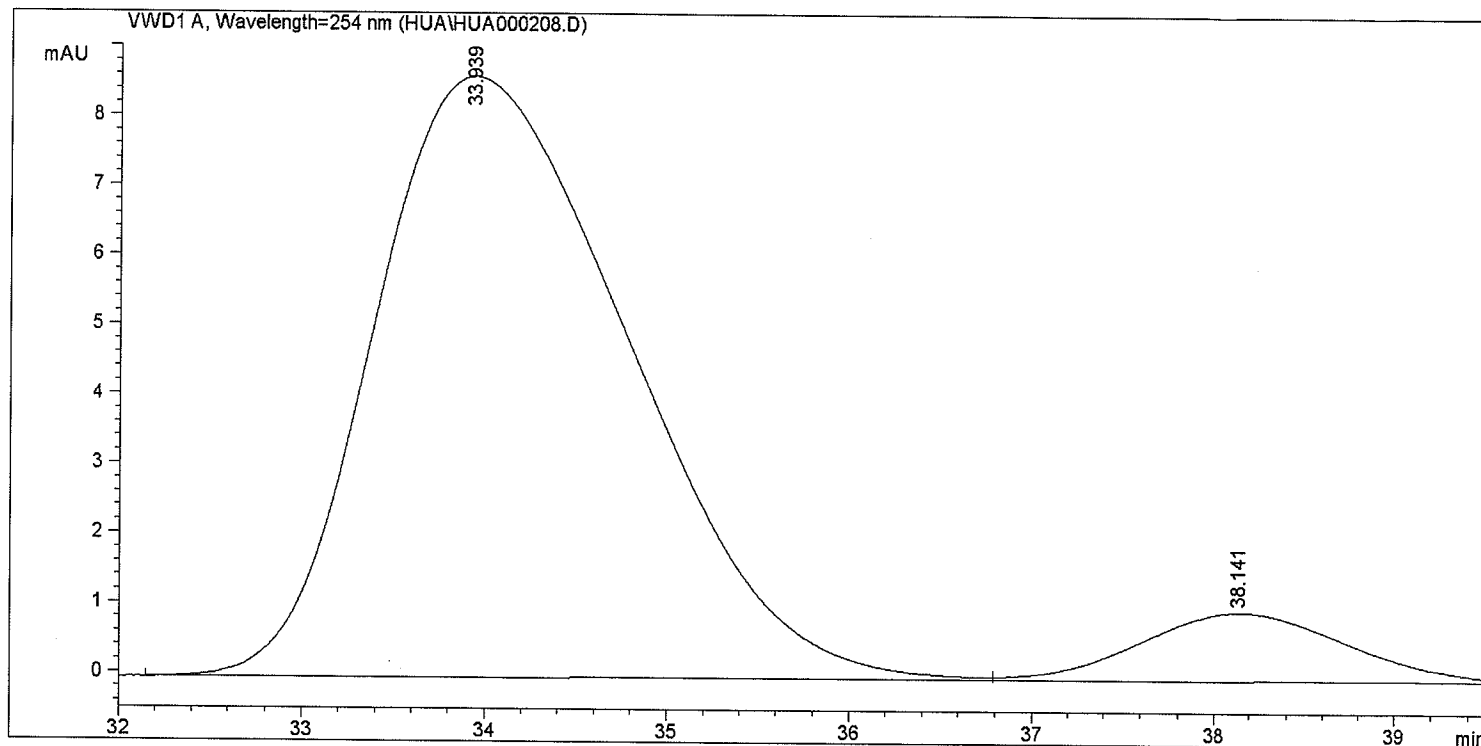

=====  
Fraction Information  
=====

Fraction collection off

=====  
No Fractions found.  
=====

=====  
Area Percent Report  
=====

Sorted By : Signal  
Multiplier : 1.0000  
Dilution : 1.0000  
Use Multiplier & Dilution Factor with ISTDs

Signal 1: VWD1 A, Wavelength=254 nm

| Peak # | RetTime [min] | Type | Width [min] | Area mAU *s | Height [mAU] | Area %  |
|--------|---------------|------|-------------|-------------|--------------|---------|
| 1      | 33.939        | VV   | 1.5607      | 836.48260   | 8.63813      | 91.4711 |
| 2      | 38.141        | VBA  | 1.2410      | 77.99489    | 9.82175e-1   | 8.5289  |

Sample Name: 14-71 mix

```

=====
Acq. Operator   : HUA                      Seq. Line :
Acq. Instrument : Instrument 1              Location  : V
Injection Date  : 11/12/2009 8:46:47 PM    Inj       :
                                           Inj Volume: 5
Acq. Method     : C:\CHEM32\1\METHODS\022008CW.M
Last changed    : 11/12/2009 3:28:38 PM by HUA
Analysis Method : C:\CHEM32\1\METHODS\HUA.M
Last changed    : 3/15/2010 7:36:34 PM by CHAO
                  (modified after loading)
Method Info     : ADanalytical column, 1.0 mL/min, 254 nm, IPA:HEX:10:90
=====

```

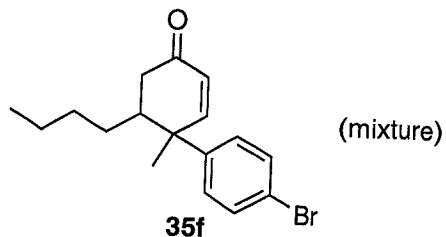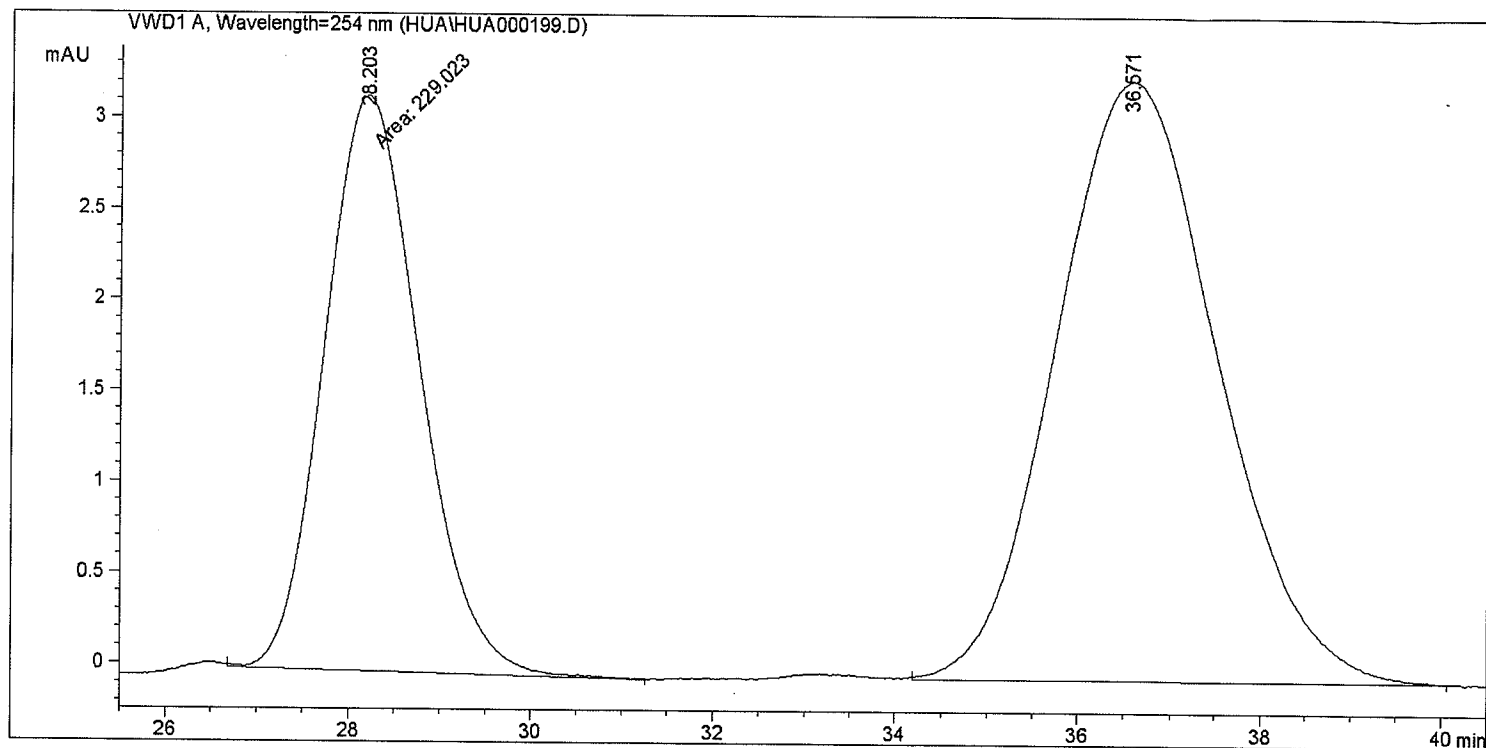

```

=====
Fraction Information
=====

```

Fraction collection off

No Fractions found.

```

=====
Area Percent Report
=====

```

```

Sorted By      : Signal
Multiplier     : 1.0000
Dilution       : 1.0000
Use Multiplier & Dilution Factor with ISTDs

```

Signal 1: VWD1 A, Wavelength=254 nm

| Peak # | RetTime [min] | Type | Width [min] | Area mAU*s | Height [mAU] | Area %  |
|--------|---------------|------|-------------|------------|--------------|---------|
| 1      | 28.203        | MM   | 1.2065      | 229.02348  | 3.16382      | 36.0976 |
| 2      | 36.571        | BB   | 1.8783      | 405.43280  | 3.29458      | 63.9024 |

Sample Name: 14-72

```

=====
Acq. Operator   : HUA                               Seq. Line : 1
Acq. Instrument : Instrument 1                       Location  : Vial 1
Injection Date  : 11/12/2009 4:47:24 PM              Inj       : 1
                                                    Inj Volume: 5 µl

Acq. Method     : C:\CHEM32\1\METHODS\022008CW.M
Last changed    : 11/12/2009 3:28:38 PM by HUA
Analysis Method : C:\CHEM32\1\METHODS\HUA.M
Last changed    : 3/15/2010 7:39:48 PM by CHAO
                  (modified after loading)

Method Info     : ADanalytical column, 1.0 mL/min, 254 nm, IPA:HEX10:90
=====

```

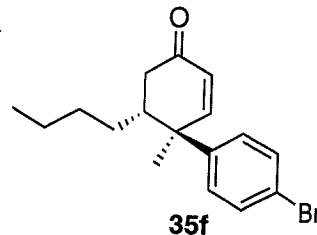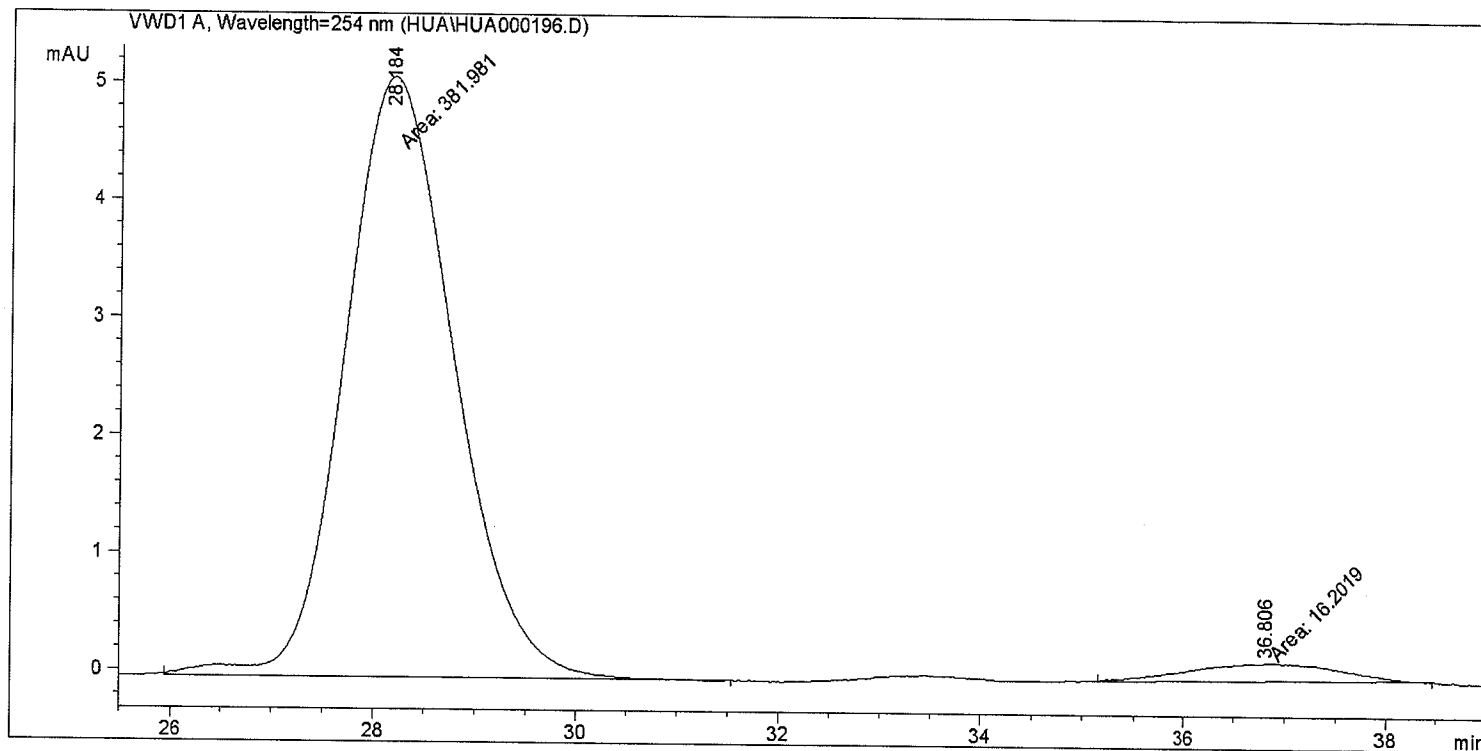

```

=====
Fraction Information
=====

```

```

Fraction collection off
=====

```

```

No Fractions found.
=====

```

```

=====
Area Percent Report
=====

```

```

Sorted By      : Signal
Multiplier     : 1.0000
Dilution       : 1.0000
Use Multiplier & Dilution Factor with ISTDs

```

Signal 1: VWD1 A, Wavelength=254 nm

| Peak # | RetTime [min] | Type | Width [min] | Area mAU*s | Height [mAU] | Area %  |
|--------|---------------|------|-------------|------------|--------------|---------|
| 1      | 28.184        | MM   | 1.2459      | 381.98132  | 5.10981      | 95.9310 |
| 2      | 36.806        | MM   | 1.7635      | 16.20193   | 1.53122e-1   | 4.0690  |



Sample Name: 13-96mix

```
=====
Acq. Operator   : Hua                      Seq. Line : 1
Acq. Instrument : Instrument 1             Location  : Via
Injection Date  : 9/25/2009 2:02:26 PM    Inj       :
Inj Volume     : 5 µl                    Inj Volume: 5 µl

Acq. Method     : C:\CHEM32\1\METHODS\022008CW.M
Last changed    : 9/25/2009 2:00:26 PM by Hua
Analysis Method : C:\CHEM32\1\METHODS\HUA.M
Last changed    : 3/15/2010 7:40:47 PM by CHAO
                  (modified after loading)
Method Info     : ADanalytical column, 1.0 mL/min, 254 nm, IPA:HEX10:90
=====
```

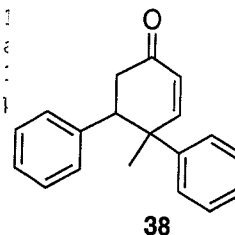

(mixture)

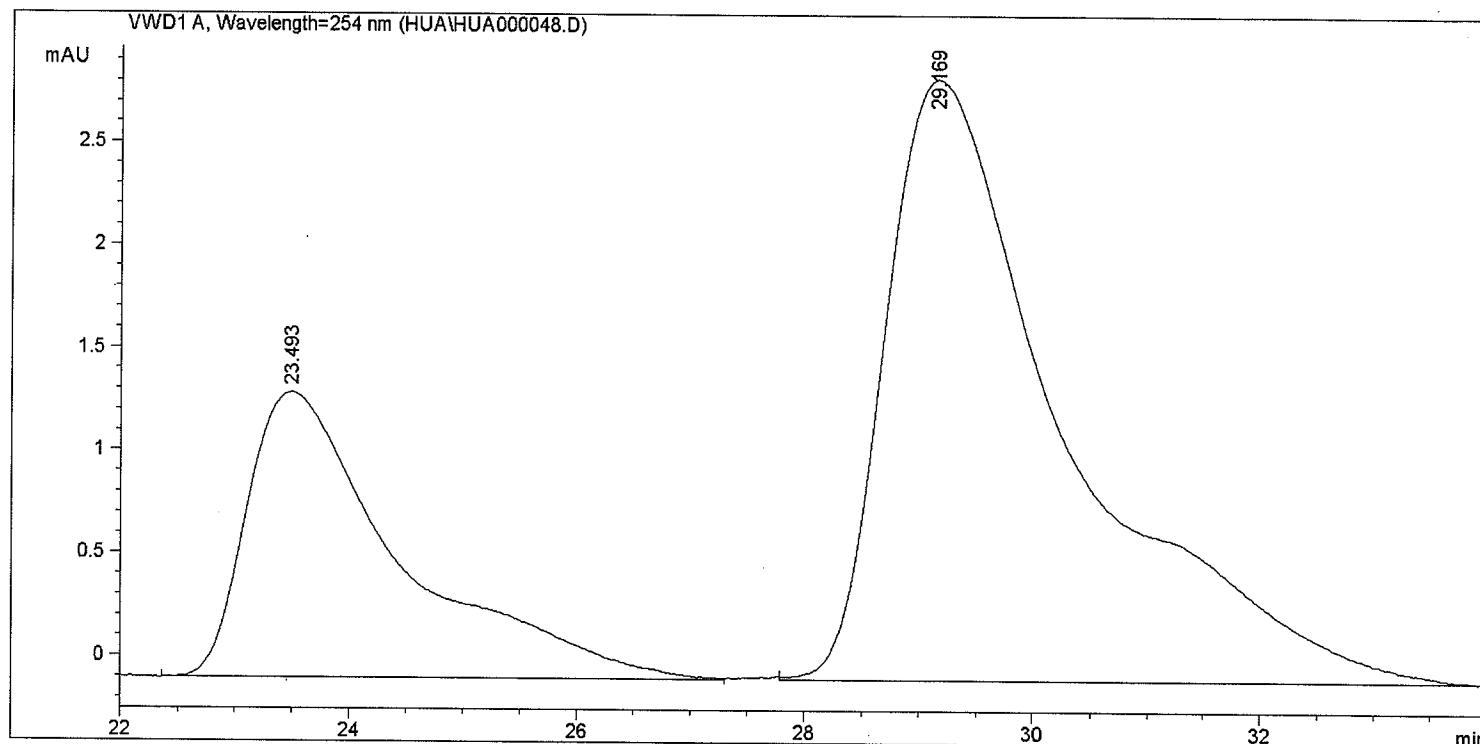

# Fraction Information

Fraction collection off

No Fractions found.

# Area Percent Report

```
Sorted By      : Signal
Multiplier     : 1.0000
Dilution       : 1.0000
Use Multiplier & Dilution Factor with ISTDs
```

Signal 1: VWD1 A, Wavelength=254 nm

| Peak # | RetTime [min] | Type | Width [min] | Area mAU *s | Height [mAU] | Area %  |
|--------|---------------|------|-------------|-------------|--------------|---------|
| 1      | 23.493        | BB   | 1.3267      | 129.00116   | 1.39086      | 28.7451 |
| 2      | 29.169        | BB   | 1.5678      | 319.77557   | 2.92245      | 71.2549 |

Sample Name: 14-37

```
=====
Acq. Operator   : Hua                      Seq. Line :    1
Acq. Instrument : Instrument 1              Location  : Vial 1
Injection Date  : 10/15/2009 7:37:53 PM    Inj       :    1
                                           Inj Volume: 5 µl

Acq. Method     : C:\CHEM32\1\METHODS\022008CW.M
Last changed    : 10/15/2009 5:01:03 PM by Hua
Analysis Method : C:\CHEM32\1\METHODS\HUA.M
Last changed    : 3/15/2010 7:41:50 PM by CHAO
                  (modified after loading)

Method Info     : ADanalytical column, 1.0 mL/min, 254 nm, IPA:HEX10:90
=====
```

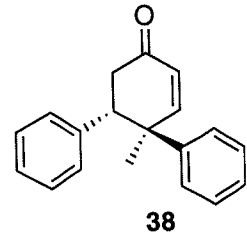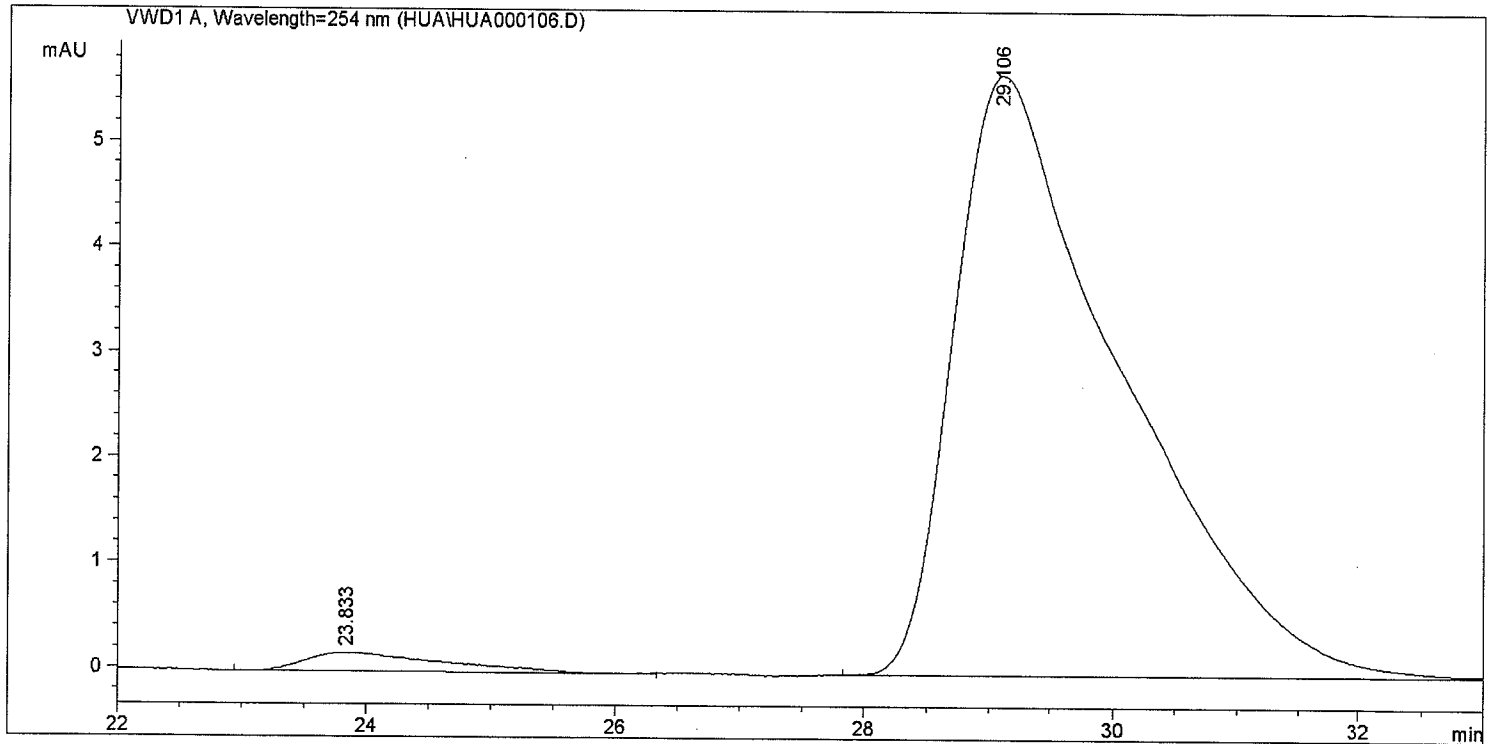

=====  
Fraction Information  
=====

Fraction collection off

No Fractions found.

=====  
Area Percent Report  
=====

```
Sorted By      :      Signal
Multiplier     :      1.0000
Dilution       :      1.0000
Use Multiplier & Dilution Factor with ISTDs
```

Signal 1: VWD1 A, Wavelength=254 nm

| Peak # | RetTime [min] | Type | Width [min] | Area mAU *s | Height [mAU] | Area %  |
|--------|---------------|------|-------------|-------------|--------------|---------|
| 1      | 23.833        | BB   | 1.0435      | 13.80718    | 1.77099e-1   | 2.5058  |
| 2      | 29.106        | BB   | 1.3256      | 537.20923   | 5.70541      | 97.4942 |

Sample Name: 14-3 mix

```

=====
Acq. Operator   : Hua                      Seq. Line :    1
Acq. Instrument : Instrument 1             Location  : Via
Injection Date  : 9/29/2009 5:53:14 PM    Inj       :    1
                                           Inj Volume: 5 µl

Acq. Method     : C:\CHEM32\1\METHODS\022008CW.M
Last changed    : 9/29/2009 5:00:17 PM by Hua
Analysis Method : C:\CHEM32\1\METHODS\HUA.M
Last changed    : 3/15/2010 7:42:49 PM by CHAO
                  (modified after loading)

Method Info     : ADanalytical column, 1.0 mL/min, 254 nm, IPA:1
=====

```

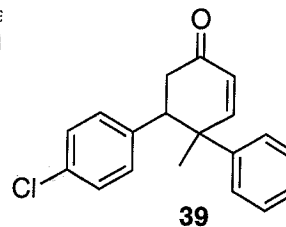

(mixture)

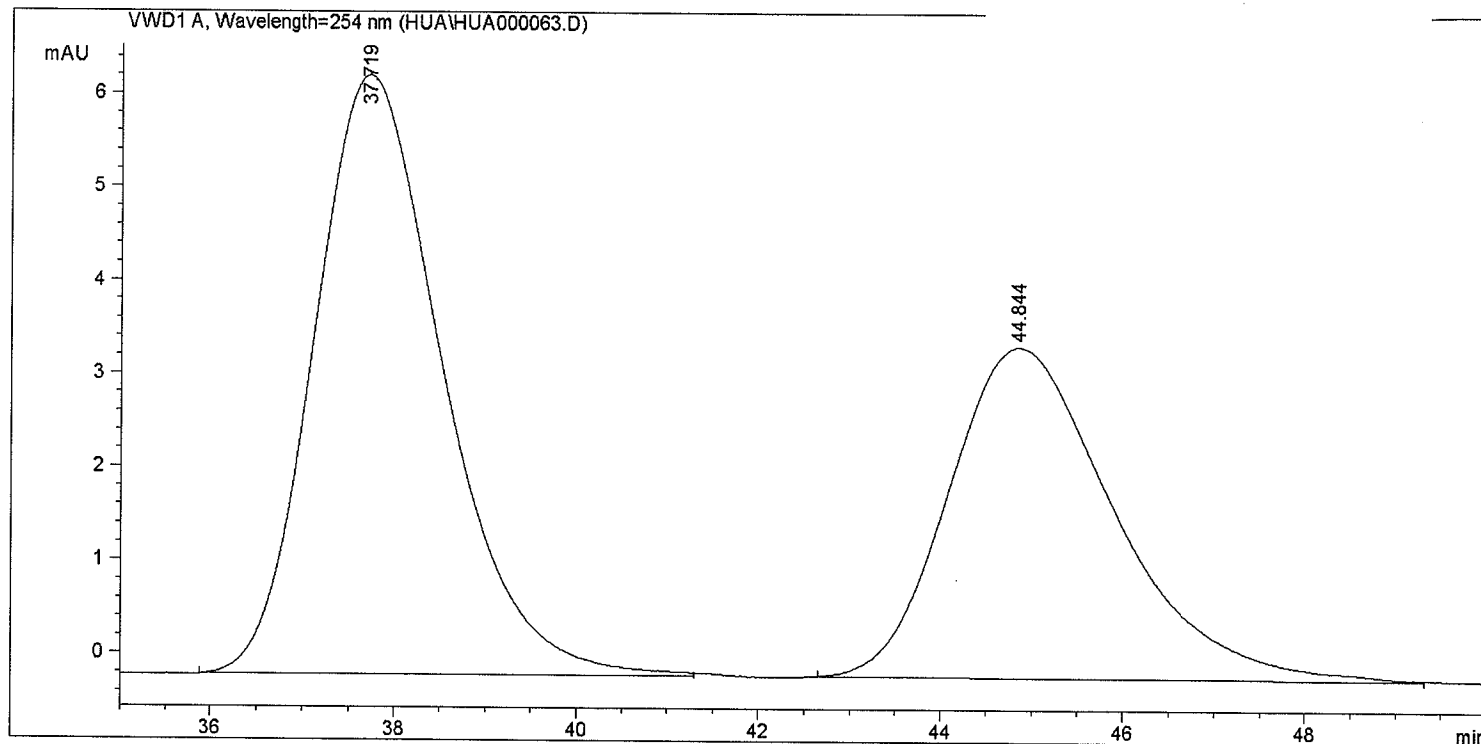

```

=====
Fraction Information
=====

```

Fraction collection off

No Fractions found.

```

=====
Area Percent Report
=====

```

```

Sorted By      : Signal
Multiplier     : 1.0000
Dilution       : 1.0000
Use Multiplier & Dilution Factor with ISTDs

```

Signal 1: VWD1 A, Wavelength=254 nm

| Peak # | RetTime [min] | Type | Width [min] | Area mAU*s | Height [mAU] | Area %  |
|--------|---------------|------|-------------|------------|--------------|---------|
| 1      | 37.719        | BB   | 1.5028      | 625.80396  | 6.42740      | 58.3159 |
| 2      | 44.844        | BB   | 1.8810      | 447.32410  | 3.54212      | 41.6841 |

Sample Name: 14-34

```
=====
Acq. Operator   : HUA                      Seq. Line :    1
Acq. Instrument : Instrument 1              Location  : Vial 1
Injection Date  : 10/18/2009 9:00:42 PM    Inj       :    1
                                           Inj Volume: 5 µl

Acq. Method     : C:\CHEM32\1\METHODS\022008CW.M
Last changed    : 10/18/2009 8:58:45 PM by HUA
Analysis Method : C:\CHEM32\1\METHODS\HUA.M
Last changed    : 3/15/2010 7:44:47 PM by CHAO
                  (modified after loading)

Method Info     : ADanalytical column, 1.0 mL/min, 254 nm, IPA:HEX10:90
=====
```

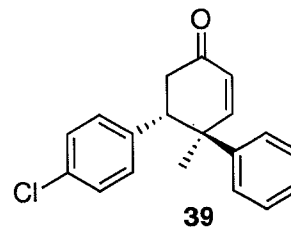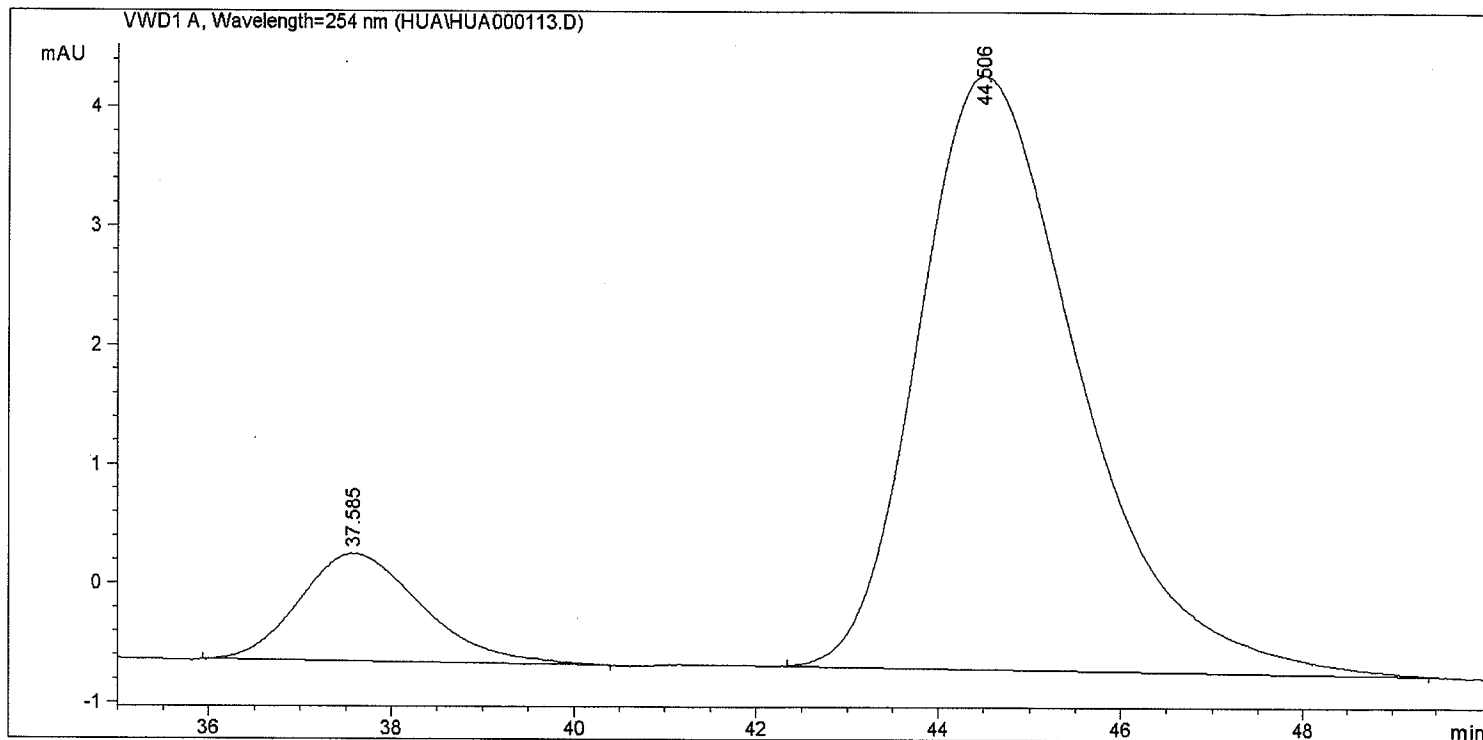

=====  
Fraction Information  
=====

Fraction collection off

No Fractions found.

=====  
Area Percent Report  
=====

```
Sorted By      :      Signal
Multiplier     :      1.0000
Dilution       :      1.0000
Use Multiplier & Dilution Factor with ISTDs
```

Signal 1: VWD1 A, Wavelength=254 nm

| Peak # | RetTime [min] | Type | Width [min] | Area mAU *s | Height [mAU] | Area %  |
|--------|---------------|------|-------------|-------------|--------------|---------|
| 1      | 37.585        | BB   | 1.3767      | 85.15369    | 9.05517e-1   | 12.2267 |
| 2      | 44.506        | BB   | 1.8555      | 611.30365   | 4.98627      | 87.7733 |

=====

|                 |                                                         |            |        |
|-----------------|---------------------------------------------------------|------------|--------|
| Acq. Operator   | : Chris                                                 | Seq. Line  | : 1    |
| Acq. Instrument | : Instrument 1                                          | Location   | : Vial |
| Injection Date  | : 2/23/2010 1:32:03 PM                                  | Inj        | : 1    |
|                 |                                                         | Inj Volume | : 5 µl |
| Acq. Method     | : C:\CHEM32\1\METHODS\HUA.M                             |            |        |
| Last changed    | : 2/23/2010 1:30:03 PM by Chris                         |            |        |
| Analysis Method | : C:\CHEM32\1\METHODS\HUA.M                             |            |        |
| Last changed    | : 3/15/2010 7:45:04 PM by CHAO                          |            |        |
|                 | (modified after loading)                                |            |        |
| Method Info     | : ADanalytical column, 1.0 mL/min, 254 nm, IPA:HEX10:90 |            |        |

=====

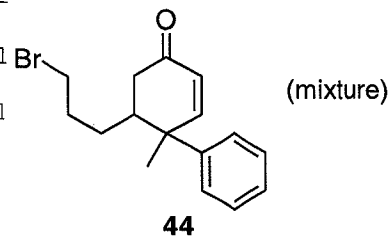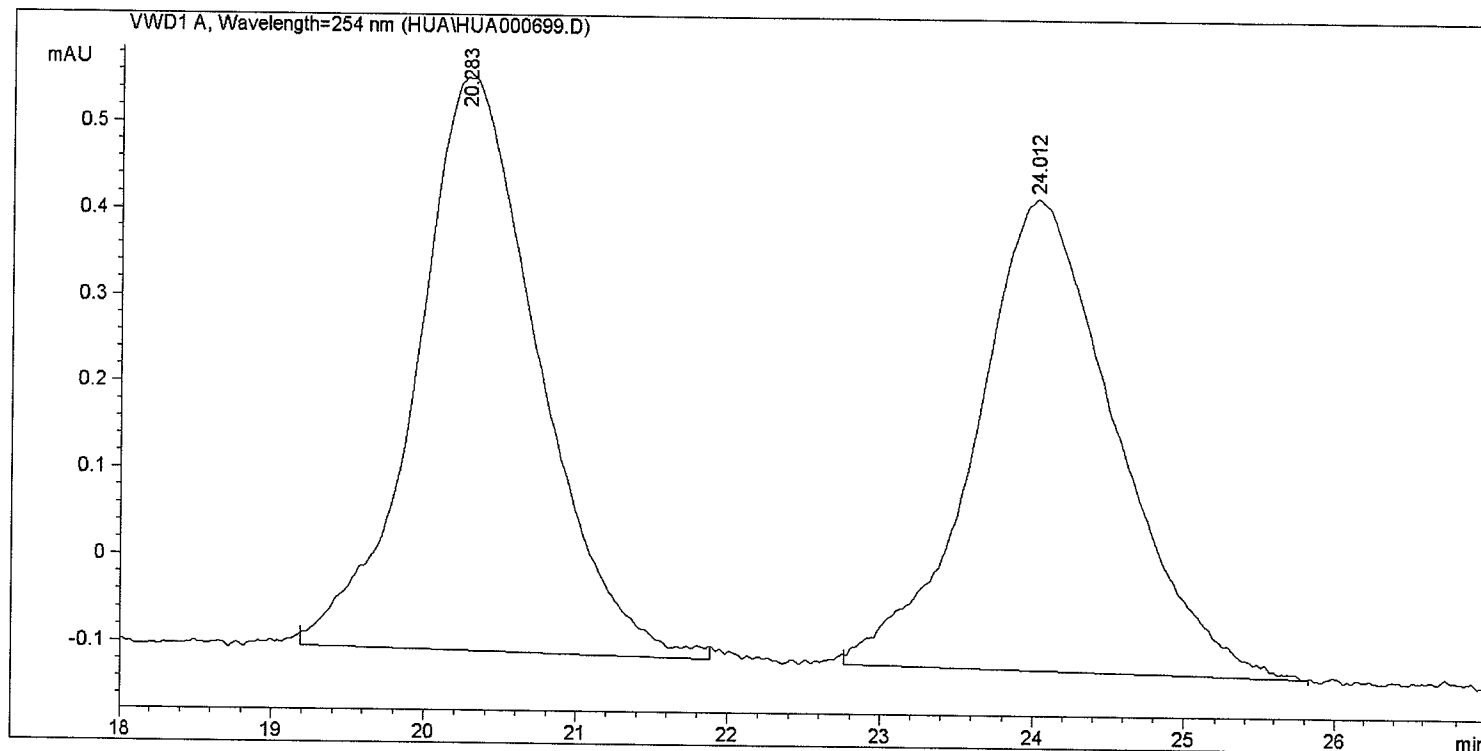

=====

Fraction Information

=====

Fraction collection off

No Fractions found.

=====

Area Percent Report

=====

Sorted By : Signal  
Multiplier : 1.0000  
Dilution : 1.0000  
Use Multiplier & Dilution Factor with ISTDs

Signal 1: VWD1 A, Wavelength=254 nm

| Peak # | RetTime [min] | Type | Width [min] | Area mAU *s | Height [mAU] | Area %  |
|--------|---------------|------|-------------|-------------|--------------|---------|
| 1      | 20.283        | BB   | 0.8339      | 36.67739    | 6.60828e-1   | 51.1423 |
| 2      | 24.012        | BB   | 0.9685      | 35.03900    | 5.42867e-1   | 48.8577 |

Sample Name: 15-57

```
=====
Acq. Operator   : Chris                      Seq. Line :    1
Acq. Instrument : Instrument 1                Location  : Vial 1
Injection Date  : 2/23/2010 2:06:58 PM        Inj       :    1
                                           Inj Volume: 5 µl

Acq. Method     : C:\CHEM32\1\METHODS\HUA.M
Last changed    : 2/23/2010 1:30:03 PM by Chris
Analysis Method : C:\CHEM32\1\METHODS\HUA.M
Last changed    : 3/15/2010 7:45:59 PM by CHAO
                  (modified after loading)

Method Info     : ADanalytical column, 1.0 mL/min, 254 nm, IPA:HEX10:90
=====
```

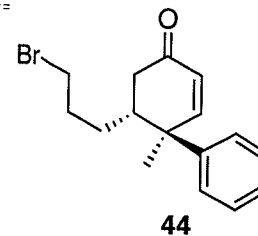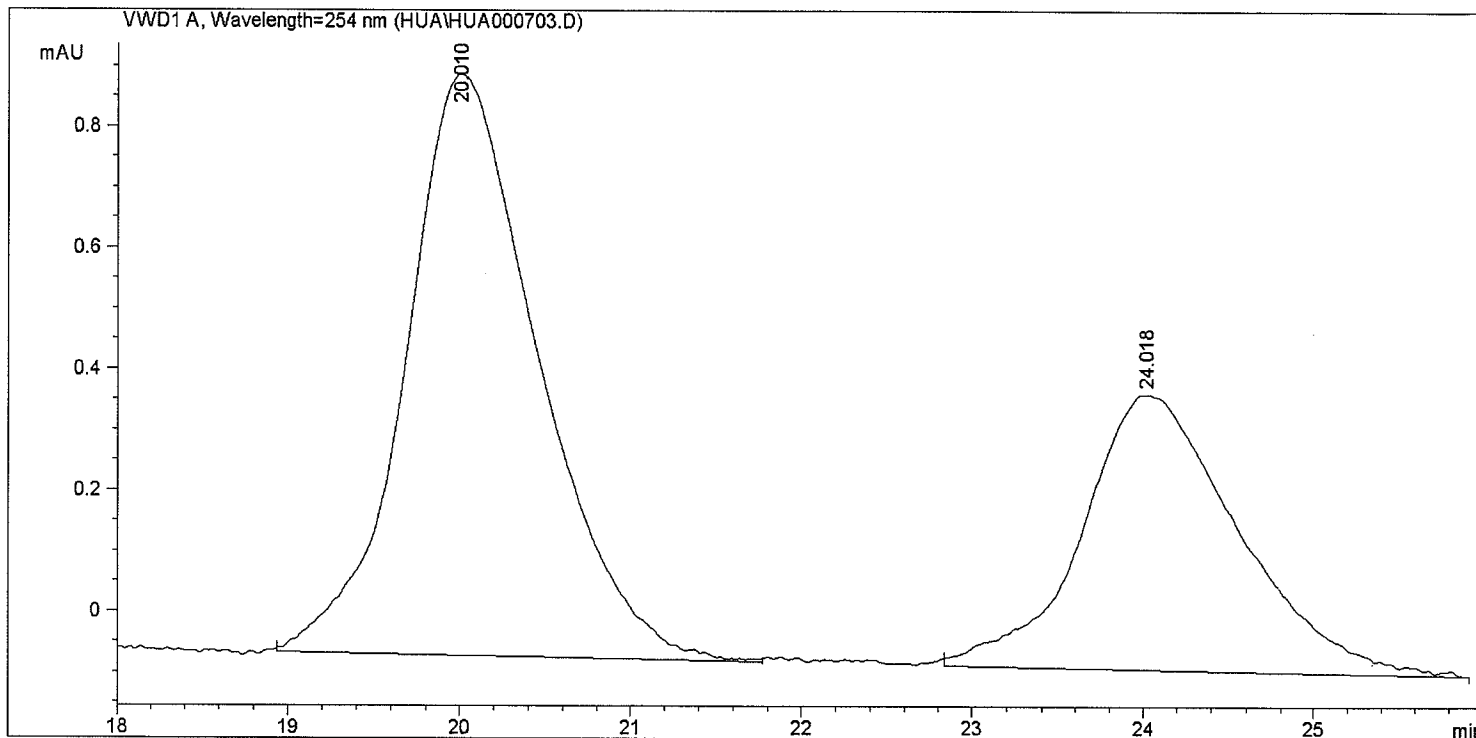

```
=====
Fraction Information
=====
```

Fraction collection off

No Fractions found.

```
=====
Area Percent Report
=====
```

```
Sorted By      :      Signal
Multiplier     :      1.0000
Dilution       :      1.0000
Use Multiplier & Dilution Factor with ISTDs
```

Signal 1: VWD1 A, Wavelength=254 nm

| Peak # | RetTime [min] | Type | Width [min] | Area mAU | Height [mAU] | Area %  |
|--------|---------------|------|-------------|----------|--------------|---------|
| 1      | 20.010        | BB   | 0.7932      | 51.40913 | 9.60672e-1   | 63.7737 |
| 2      | 24.018        | BBA  | 0.9581      | 29.20273 | 4.55184e-1   | 36.2263 |

Sample Name: 15-10mix

=====

Acq. Operator : HUA  
 Acq. Instrument : Instrument 1  
 Injection Date : 2/9/2010 4:42:57 PM  
 Acq. Method : C:\CHEM32\1\METHODS\HUA.M  
 Last changed : 2/9/2010 4:40:50 PM by HUA  
 Analysis Method : C:\CHEM32\1\METHODS\HUA.M  
 Last changed : 3/15/2010 7:46:48 PM by CHAO  
 (modified after loading)  
 Method Info : ADanalytical column, 1.0 mL/min, 254 nm, IPA:HEX10:90

Seq. Line : 1  
 Location : Vial  
 Inj : 1  
 Inj Volume : 5 µl

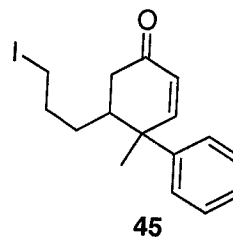

(mixture)

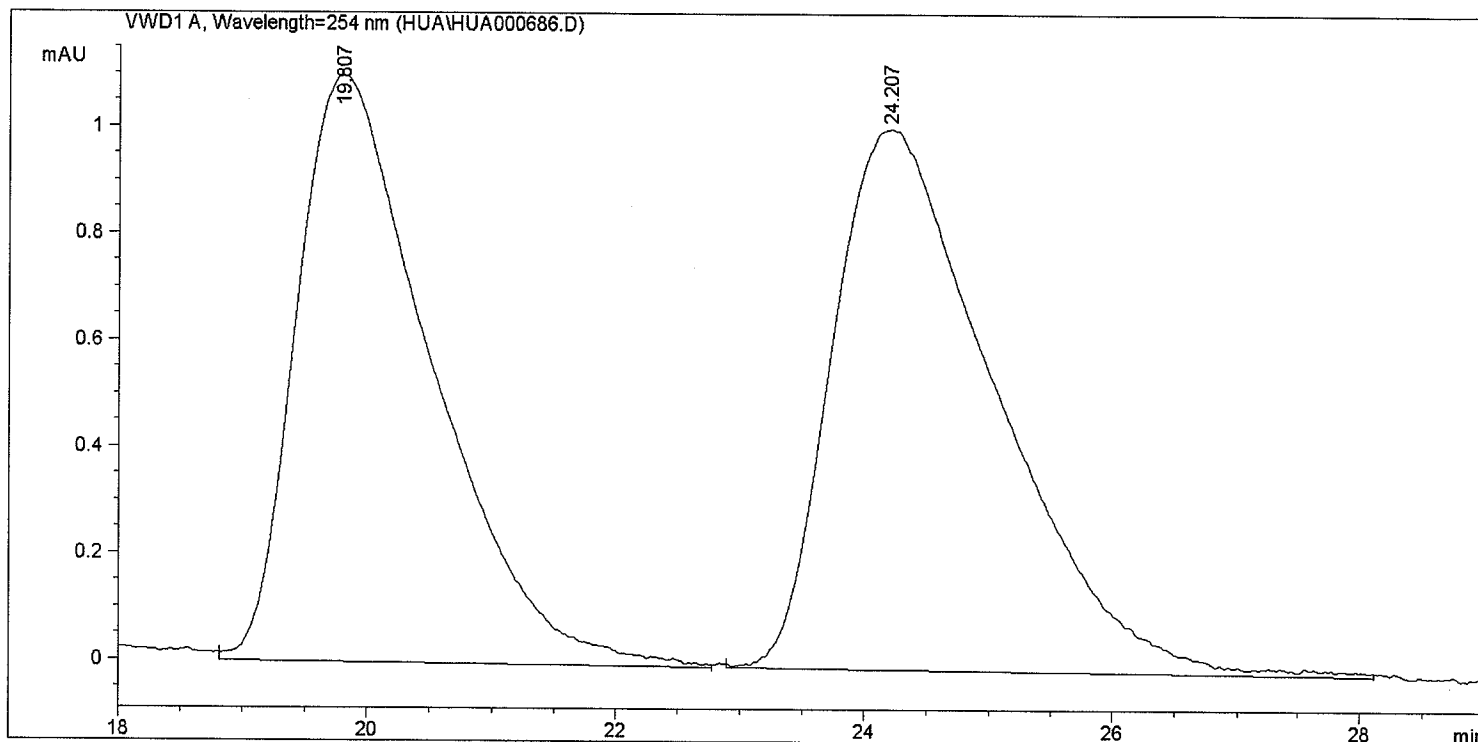

=====

Fraction Information

Fraction collection off

No Fractions found.

=====

Area Percent Report

Sorted By : Signal  
 Multiplier : 1.0000  
 Dilution : 1.0000  
 Use Multiplier & Dilution Factor with ISTDs

Signal 1: VWD1 A, Wavelength=254 nm

| Peak # | RetTime [min] | Type | Width [min] | Area mAU *s | Height [mAU] | Area %  |
|--------|---------------|------|-------------|-------------|--------------|---------|
| 1      | 19.807        | VB   | 1.0913      | 83.10751    | 1.09980      | 47.0590 |
| 2      | 24.207        | BB   | 1.3718      | 93.49527    | 1.01491      | 52.9410 |

Sample Name: 15-32

```
=====
Acq. Operator   : HUA                               Seq. Line :    1
Acq. Instrument : Instrument 1                       Location  : Vial 1
Injection Date  : 2/10/2010 10:56:05 AM              Inj       :    1
                                                    Inj Volume: 5 µl

Acq. Method     : C:\CHEM32\1\METHODS\HUA.M
Last changed    : 2/10/2010 10:16:26 AM by HUA
Analysis Method : C:\CHEM32\1\METHODS\HUA.M
Last changed    : 3/15/2010 7:47:55 PM by CHAO
                  (modified after loading)

Method Info     : ADanalytical column, 1.0 mL/min, 254 nm, IPA:HEX10:90
=====
```

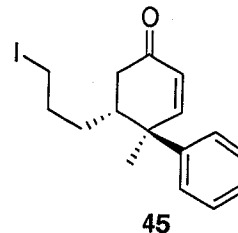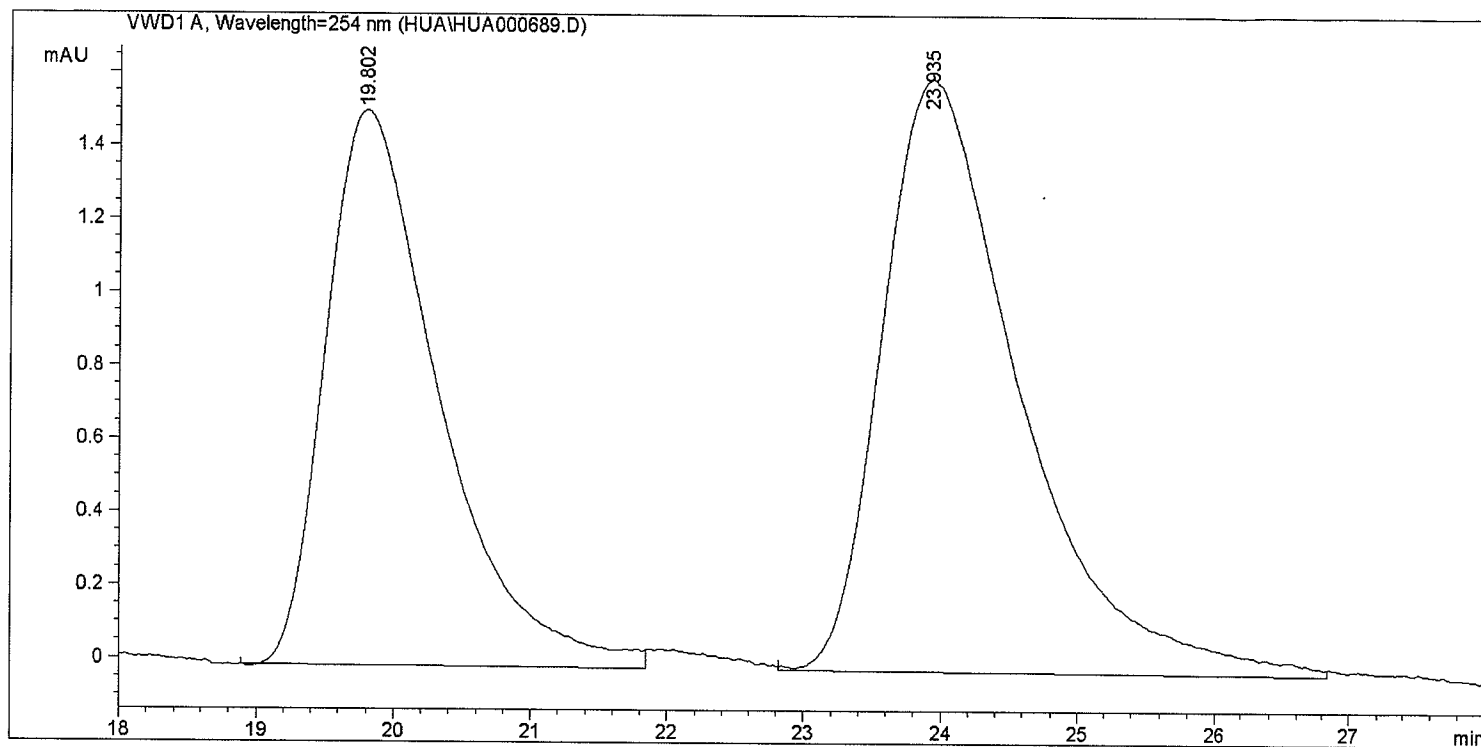

```
=====
Fraction Information
=====
```

Fraction collection off

No Fractions found.

```
=====
Area Percent Report
=====
```

```
Sorted By      :      Signal
Multiplier     :      1.0000
Dilution       :      1.0000
Use Multiplier & Dilution Factor with ISTDs
```

Signal 1: VWD1 A, Wavelength=254 nm

| Peak # | RetTime [min] | Type | Width [min] | Area mAU*s | Height [mAU] | Area %  |
|--------|---------------|------|-------------|------------|--------------|---------|
| 1      | 19.802        | BB   | 0.8494      | 86.94116   | 1.51655      | 43.3616 |
| 2      | 23.935        | BB   | 1.0397      | 113.56128  | 1.61898      | 56.6384 |



Sample Name: 15-2mix

=====

Acq. Operator : HUA  
 Acq. Instrument : Instrument 1  
 Injection Date : 3/3/2010 4:38:05 PM

Acq. Method : C:\CHEM32\1\METHODS\HUA.M  
 Last changed : 3/3/2010 3:48:56 PM by HUA  
 Analysis Method : C:\CHEM32\1\METHODS\HUA.M  
 Last changed : 3/15/2010 7:51:01 PM by CHAO  
 (modified after loading)

Seq. Line : 1  
 Location : Vial  
 Inj : 1  
 Inj Volume : 5 µl

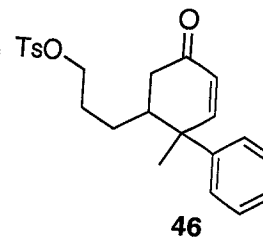

(mixture)

Method Info : ADanalytical column, 1.0 mL/min, 254 nm, IPA:HEX10:90

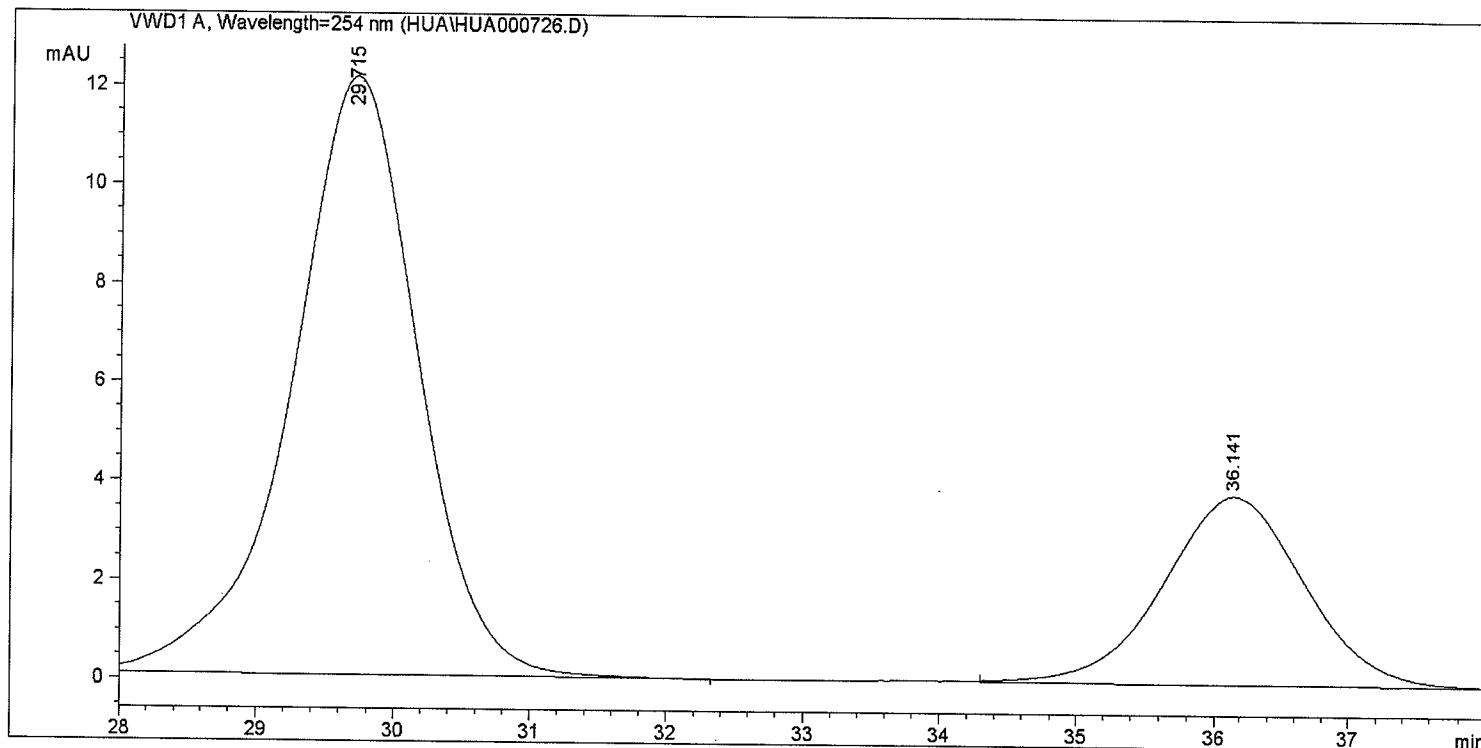

=====

Fraction Information

=====

Fraction collection off

=====

No Fractions found.

=====

Area Percent Report

Sorted By : Signal  
 Multiplier : 1.0000  
 Dilution : 1.0000  
 Use Multiplier & Dilution Factor with ISTDs

Signal 1: VWD1 A, Wavelength=254 nm

| Peak # | RetTime [min] | Type | Width [min] | Area mAU  | Area *s  | Height [mAU] | Area % |
|--------|---------------|------|-------------|-----------|----------|--------------|--------|
| 1      | 29.715        | VB   | 0.9738      | 774.17865 | 12.09683 | 73.6946      |        |
| 2      | 36.141        | BB   | 1.1255      | 276.34467 | 3.81127  | 26.3054      |        |

Sample Name: 15-71

```
=====
Acq. Operator   : HUA                      Seq. Line :    1
Acq. Instrument : Instrument 1              Location  : Vial 1
Injection Date  : 3/3/2010 8:59:04 PM      Inj       :    1
                                           Inj Volume: 5 µl

Acq. Method     : C:\CHEM32\1\METHODS\HUA.M
Last changed    : 3/3/2010 3:48:56 PM by HUA
Analysis Method : C:\CHEM32\1\METHODS\HUA.M
Last changed    : 3/15/2010 7:48:57 PM by CHAO
                  (modified after loading)
Method Info     : ADanalytical column, 1.0 mL/min, 254 nm, IPA:HEX10:90
=====
```

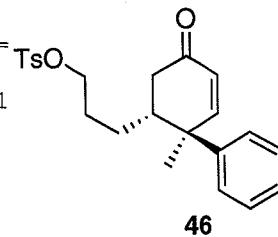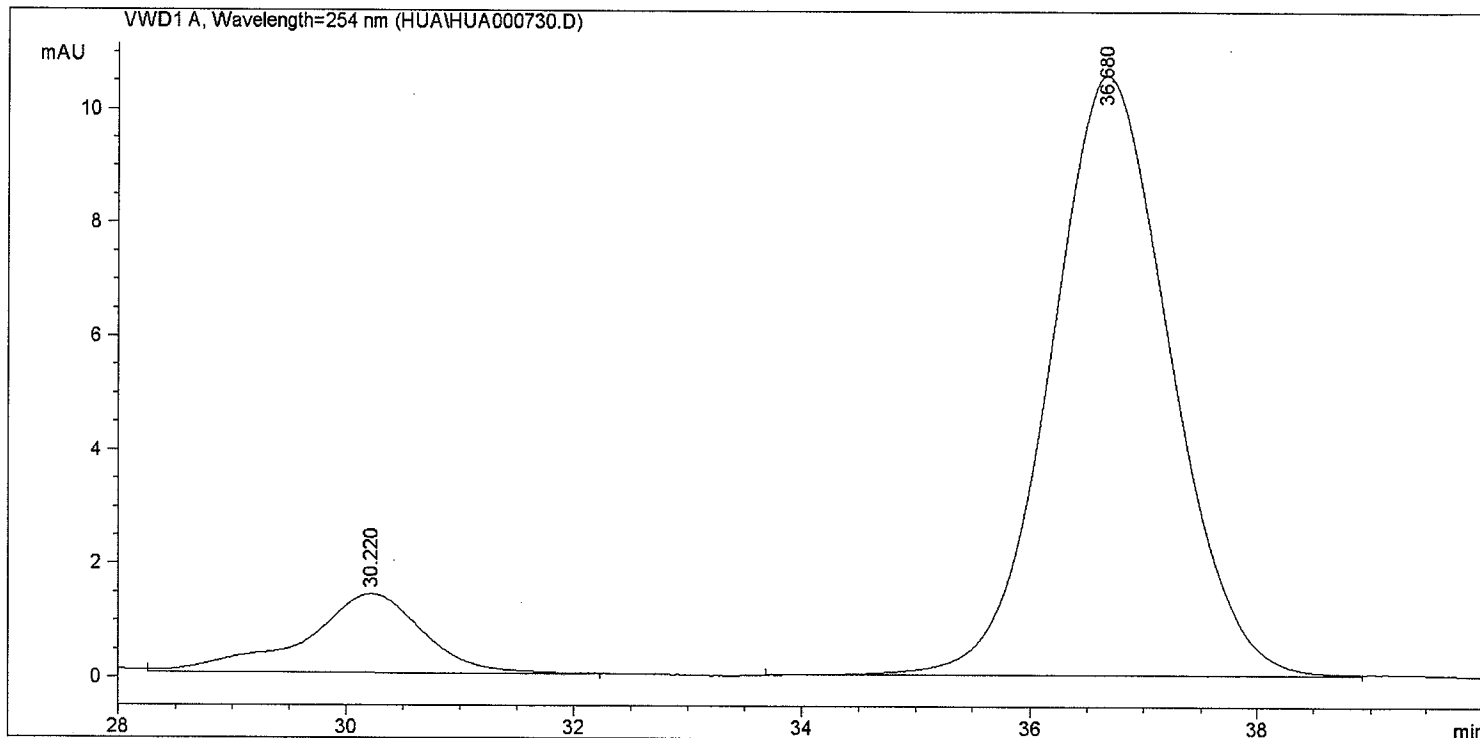

=====  
Fraction Information  
=====

Fraction collection off

No Fractions found.  
=====

=====  
Area Percent Report  
=====

```
Sorted By      :      Signal
Multiplier     :      1.0000
Dilution       :      1.0000
Use Multiplier & Dilution Factor with ISTDs
```

Signal 1: VWD1 A, Wavelength=254 nm

| Peak # | RetTime [min] | Type | Width [min] | Area mAU*s | Height [mAU] | Area %  |
|--------|---------------|------|-------------|------------|--------------|---------|
| 1      | 30.220        | VB   | 1.0701      | 102.06100  | 1.39324      | 11.7063 |
| 2      | 36.680        | BB   | 1.1234      | 769.78766  | 10.56936     | 88.2937 |

Sample Name: 15-50mix

```

=====
Acq. Operator   : HUA                      Seq. Line :    1
Acq. Instrument : Instrument 1              Location  : Vial
Injection Date  : 2/8/2010 11:18:58 AM      Inj       :    1
                                           Inj Volume: 5 µl

Acq. Method     : C:\CHEM32\1\METHODS\HUA.M
Last changed    : 2/8/2010 11:16:50 AM by HUA
Analysis Method : C:\CHEM32\1\METHODS\HUA.M
Last changed    : 3/15/2010 7:51:14 PM by CHAO
                  (modified after loading)

Method Info     : ADanalytical column, 1.0 mL/min, 254 nm, IPA:HEX10:90
=====

```

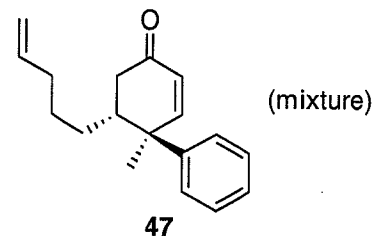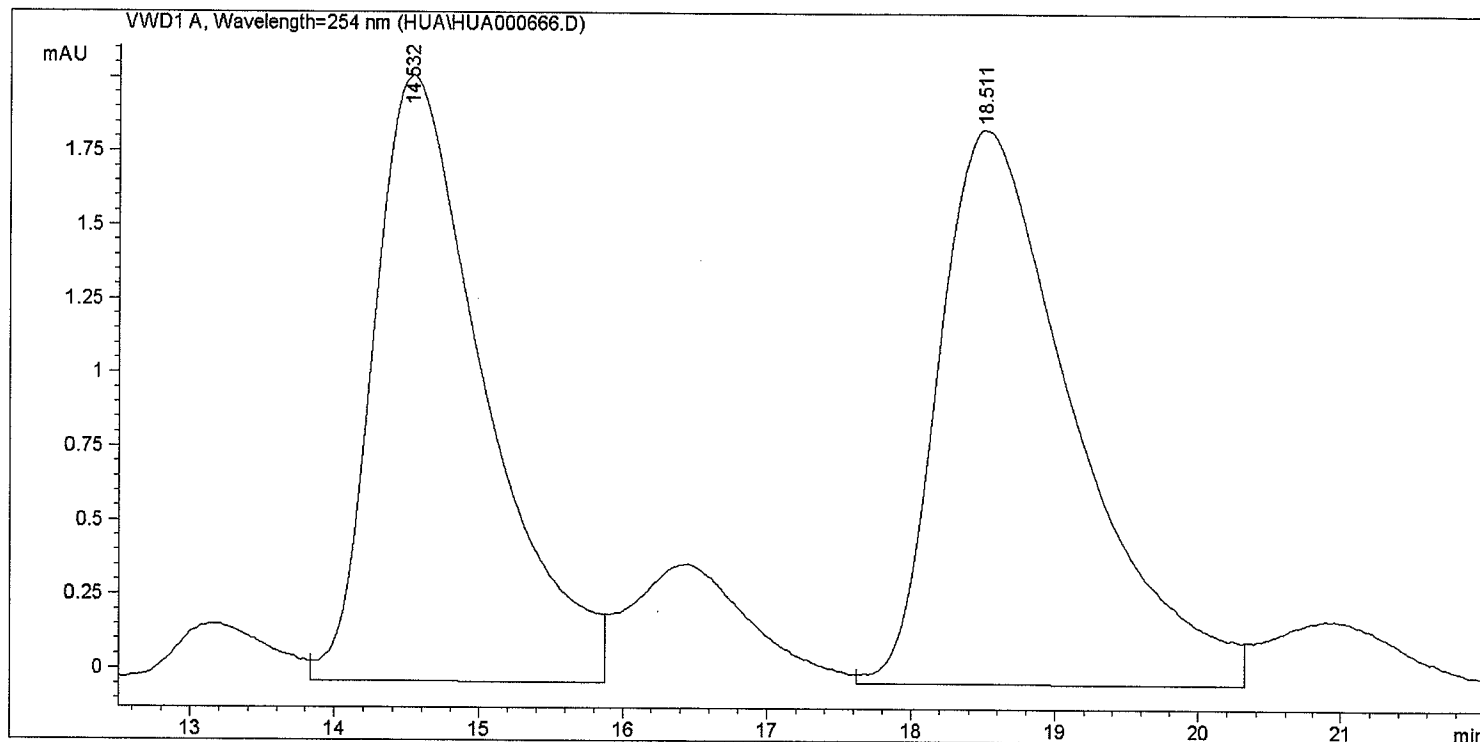

```

=====
Fraction Information
=====

```

```

Fraction collection off
=====

```

```

No Fractions found.
=====

```

```

=====
Area Percent Report
=====

```

```

Sorted By      :      Signal
Multiplier     :      1.0000
Dilution       :      1.0000
Use Multiplier & Dilution Factor with ISTDs

```

Signal 1: VWD1 A, Wavelength=254 nm

| Peak # | RetTime [min] | Type | Width [min] | Area mAU*s | Height [mAU] | Area %  |
|--------|---------------|------|-------------|------------|--------------|---------|
| 1      | 14.532        | VV   | 0.7905      | 109.30397  | 2.05138      | 47.1774 |
| 2      | 18.511        | VV   | 0.9761      | 122.38309  | 1.87725      | 52.8226 |

Sample Name: 15-51

```
=====
Acq. Operator   : HUA                               Seq. Line :    1
Acq. Instrument : Instrument 1                       Location  : Vial 1
Injection Date  : 2/8/2010 12:22:23 PM              Inj       :    1
                                                    Inj Volume: 5 µl

Acq. Method     : C:\CHEM32\1\METHODS\HUA.M
Last changed    : 2/8/2010 11:16:50 AM by HUA
Analysis Method : C:\CHEM32\1\METHODS\HUA.M
Last changed    : 3/15/2010 7:52:39 PM by CHAO
                  (modified after loading)
Method Info     : ADanalytical column, 1.0 mL/min, 254 nm, IPA:HEX10:90
=====
```

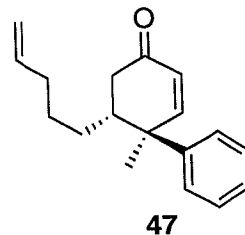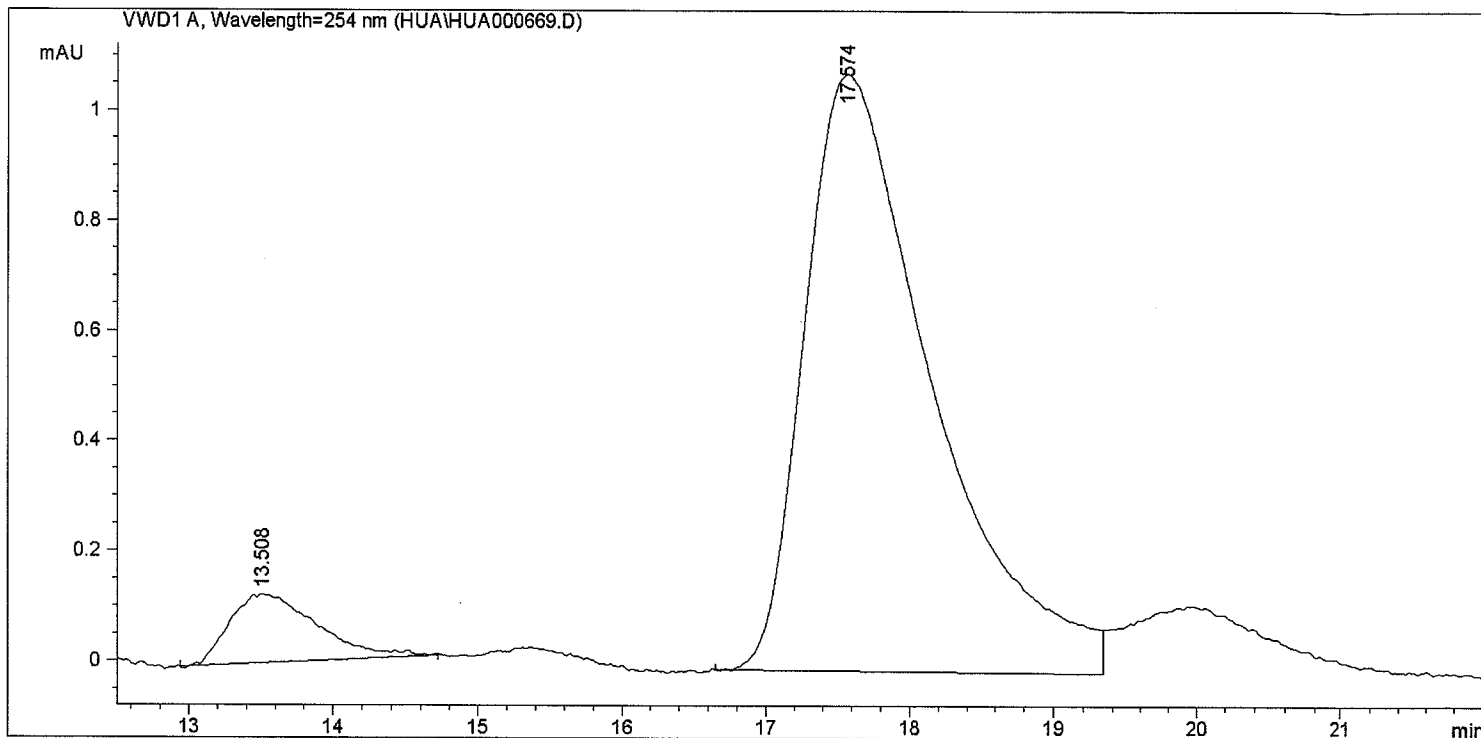

=====  
Fraction Information  
=====

Fraction collection off

No Fractions found.  
=====

=====  
Area Percent Report  
=====

```
Sorted By      :      Signal
Multiplier     :      1.0000
Dilution       :      1.0000
Use Multiplier & Dilution Factor with ISTDs
```

Signal 1: VWD1 A, Wavelength=254 nm

| Peak # | RetTime [min] | Type | Width [min] | Area mAU*s | Height [mAU] | Area %  |
|--------|---------------|------|-------------|------------|--------------|---------|
| 1      | 13.508        | BB   | 0.6230      | 5.34407    | 1.25995e-1   | 7.4450  |
| 2      | 17.574        | BV   | 0.8906      | 66.43693   | 1.08276      | 92.5550 |

=====

|                 |                                                     |            |          |
|-----------------|-----------------------------------------------------|------------|----------|
| Acq. Operator   | : HUA                                               | Seq. Line  | : 1      |
| Acq. Instrument | : Instrument 1                                      | Location   | : Vial 1 |
| Injection Date  | : 2/8/2010 9:46:38 PM                               | Inj        | : 1      |
|                 |                                                     | Inj Volume | : 5 µl   |
| Acq. Method     | : C:\CHEM32\1\METHODS\HUA.M                         |            |          |
| Last changed    | : 2/8/2010 9:44:30 PM by HUA                        |            |          |
| Analysis Method | : C:\CHEM32\1\METHODS\HUA.M                         |            |          |
| Last changed    | : 3/15/2010 7:53:26 PM by CHAO                      |            |          |
|                 | (modified after loading)                            |            |          |
| Method Info     | : ADanalytical column, 1.0 mL/min, 254 nm, IPA:HEX: |            |          |

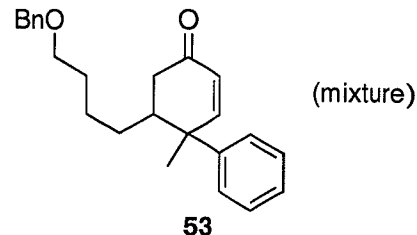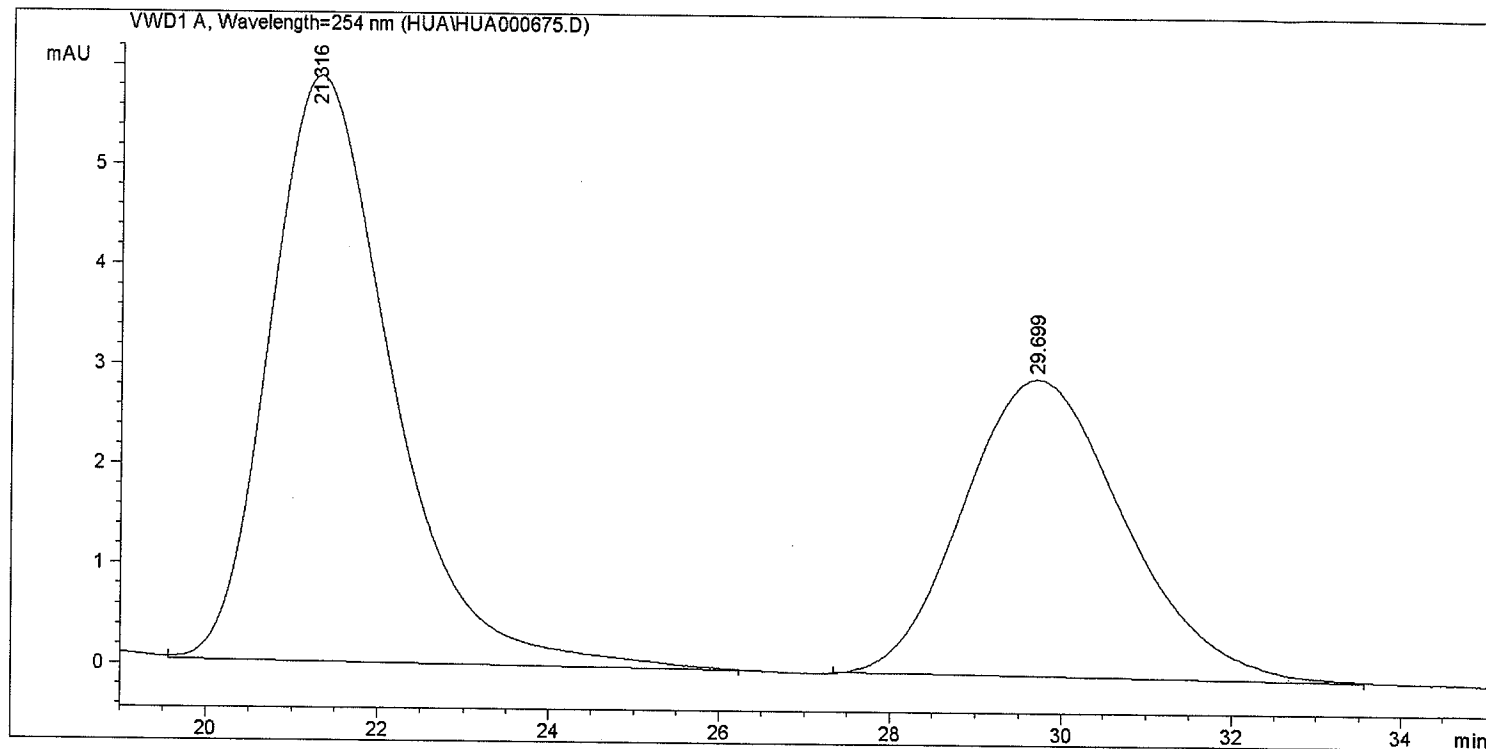

=====  
Fraction Information  
=====

Fraction collection off

No Fractions found.

=====  
Area Percent Report  
=====

Sorted By : Signal  
Multiplier : 1.0000  
Dilution : 1.0000  
Use Multiplier & Dilution Factor with ISTDs

Signal 1: VWD1 A, Wavelength=254 nm

| Peak # | RetTime [min] | Type | Width [min] | Area mAU *s | Height [mAU] | Area %  |
|--------|---------------|------|-------------|-------------|--------------|---------|
| 1      | 21.316        | VB   | 1.5305      | 580.10803   | 5.87534      | 59.7053 |
| 2      | 29.699        | BB   | 2.0112      | 391.51157   | 2.97824      | 40.2947 |

Sample Name: 15-48

```
=====
Acq. Operator   : HUA                               Seq. Line :    1
Acq. Instrument : Instrument 1                       Location  : Vial 1
Injection Date  : 2/9/2010 10:04:45 AM              Inj       :    1
                                                    Inj Volume: 5 µl

Acq. Method     : C:\CHEM32\1\METHODS\HUA.M
Last changed    : 2/9/2010 10:02:47 AM by HUA
Analysis Method : C:\CHEM32\1\METHODS\HUA.M
Last changed    : 3/15/2010 7:56:20 PM by CHAO
                  (modified after loading)
Method Info     : ADanalytical column, 1.0 mL/min, 254 nm, IPA:HEX10:90
=====
```

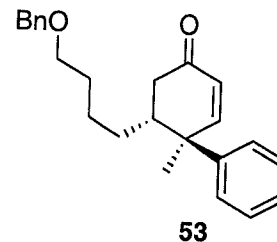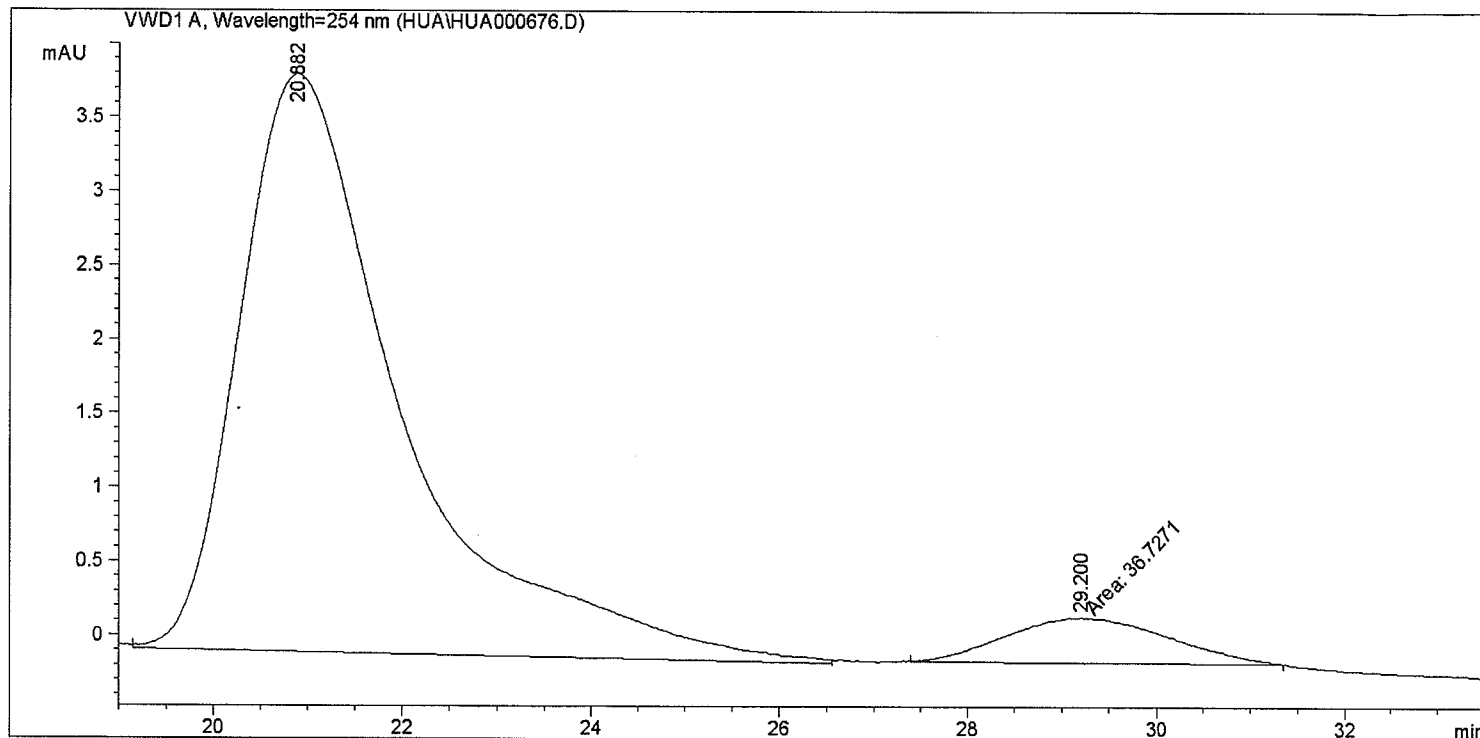

=====

Fraction Information

=====

Fraction collection off

No Fractions found.

=====

Area Percent Report

=====

Sorted By : Signal  
Multiplier : 1.0000  
Dilution : 1.0000  
Use Multiplier & Dilution Factor with ISTDs

Signal 1: VWD1 A, Wavelength=254 nm

| Peak # | RetTime [min] | Type | Width [min] | Area mAU *s | Height [mAU] | Area %  |
|--------|---------------|------|-------------|-------------|--------------|---------|
| 1      | 20.882        | VB   | 1.7658      | 464.76355   | 3.90874      | 92.6764 |
| 2      | 29.200        | MM   | 1.9998      | 36.72712    | 3.06085e-1   | 7.3236  |

```
Seq. Line : 1
Location : Via:
Inj : 1
Inj Volume : 5 µl
```

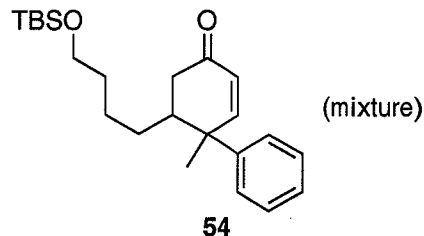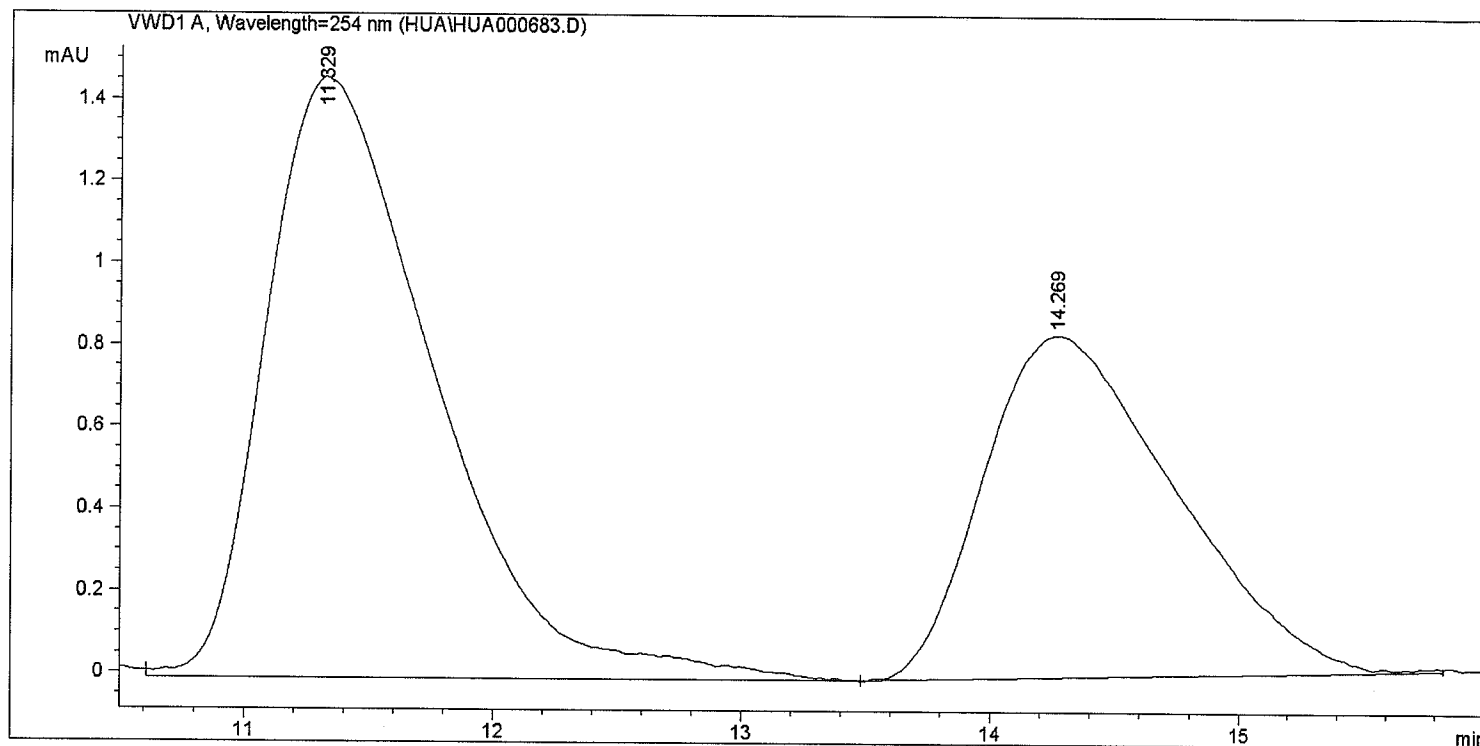

| Peak # | RetTime [min] | Type | Width [min] | Area mAU | Area *s | Height [mAU] | Area %  |
|--------|---------------|------|-------------|----------|---------|--------------|---------|
| 1      | 11.329        | VB   | 0.7117      | 68.98110 |         | 1.46703      | 60.6542 |
| 2      | 14.269        | BB   | 0.8117      | 44.74733 |         | 8.34853e-1   | 39.3458 |

Sample Name: 15-39

```

=====
Acq. Operator   : HUA                      Seq. Line :    1
Acq. Instrument : Instrument 1              Location  : Vial 1
Injection Date  : 2/9/2010 3:46:24 PM      Inj       :    1
                                           Inj Volume: 5 µl

Acq. Method     : C:\CHEM32\1\METHODS\HUA.M
Last changed    : 2/9/2010 2:40:10 PM by HUA
Analysis Method : C:\CHEM32\1\METHODS\HUA.M
Last changed    : 3/15/2010 8:00:49 PM by CHAO
                  (modified after loading)

Method Info     : ADanalytical column, 1.0 mL/min, 254 nm, IPA:HEX10:90
=====

```

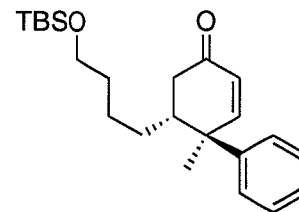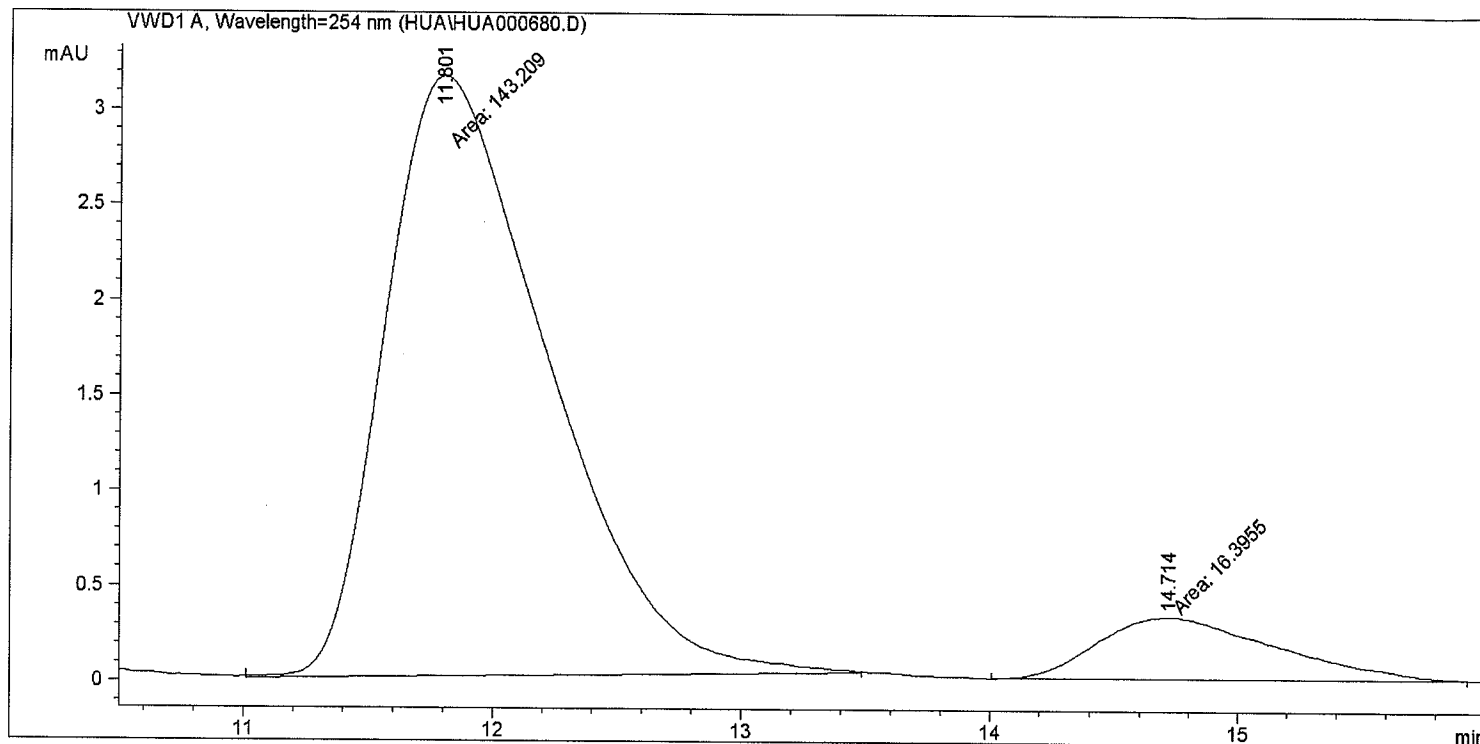

```

=====
Fraction Information
=====

```

Fraction collection off

No Fractions found.

```

=====
Area Percent Report
=====

```

```

Sorted By      : Signal
Multiplier     : 1.0000
Dilution       : 1.0000
Use Multiplier & Dilution Factor with ISTDs

```

Signal 1: VWD1 A, Wavelength=254 nm

| Peak # | RetTime [min] | Type | Width [min] | Area mAU *s | Height [mAU] | Area %  |
|--------|---------------|------|-------------|-------------|--------------|---------|
| 1      | 11.801        | MM   | 0.7571      | 143.20897   | 3.15259      | 89.7274 |
| 2      | 14.714        | MM   | 0.8387      | 16.39554    | 3.25827e-1   | 10.2726 |



```
=====
Acq. Operator   : HUA                               Seq. Line :    1
Acq. Instrument : Instrument 1                       Location  : Vial 1
Injection Date  : 2/14/2010 3:46:34 PM              Inj       :    1
                                                    Inj Volume: 5 µl

Acq. Method     : C:\CHEM32\1\METHODS\HUA.M
Last changed    : 2/14/2010 3:44:40 PM by HUA
Analysis Method : C:\CHEM32\1\METHODS\HUA.M
Last changed    : 3/15/2010 8:03:44 PM by CHAO
                  (modified after loading)
Method Info     : ADanalytical column, 1.0 mL/min, 254 nm, IPA:HEX10:90
=====
```

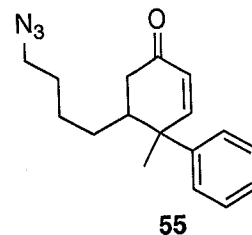

(mixture)

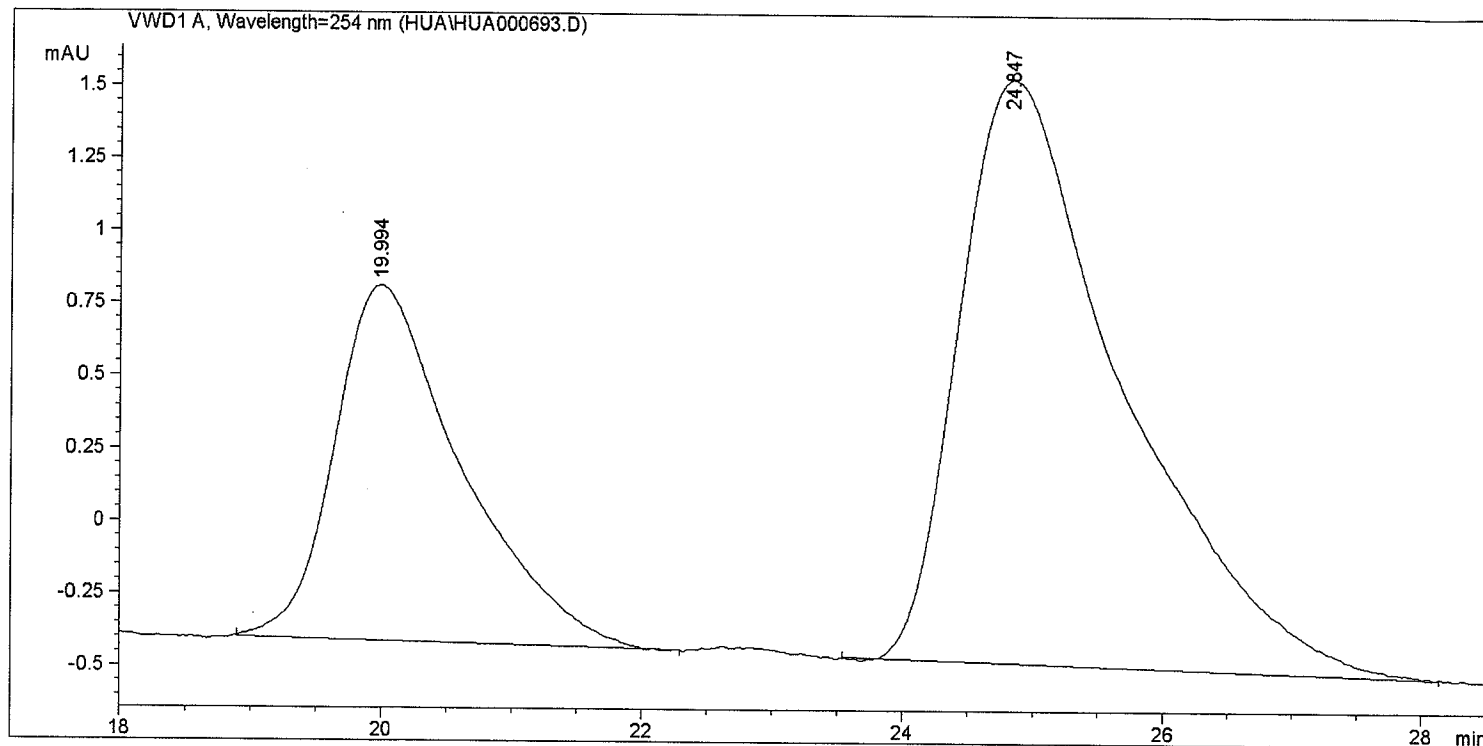

=====  
Fraction Information  
=====

Fraction collection off

No Fractions found.

=====  
Area Percent Report  
=====

Sorted By : Signal  
Multiplier : 1.0000  
Dilution : 1.0000  
Use Multiplier & Dilution Factor with ISTDs

Signal 1: VWD1 A, Wavelength=254 nm

| Peak # | RetTime [min] | Type | Width [min] | Area mAU*s | Height [mAU] | Area %  |
|--------|---------------|------|-------------|------------|--------------|---------|
| 1      | 19.994        | BB   | 0.9653      | 82.66781   | 1.22892      | 31.9125 |
| 2      | 24.847        | BB   | 1.2762      | 176.37718  | 2.01744      | 68.0875 |

Sample Name: 15-55

```
=====
Acq. Operator   : HUA                               Seq. Line :    1
Acq. Instrument : Instrument 1                       Location  : Vial 1
Injection Date  : 2/14/2010 4:23:38 PM              Inj       :    1
                                                    Inj Volume: 5 µl

Acq. Method     : C:\CHEM32\1\METHODS\HUA.M
Last changed    : 2/14/2010 3:44:40 PM by HUA
Analysis Method : C:\CHEM32\1\METHODS\HUA.M
Last changed    : 3/15/2010 8:03:57 PM by CHAO
                  (modified after loading)

Method Info     : ADanalytical column, 1.0 mL/min, 254 nm, IPA:HEX10:90
=====
```

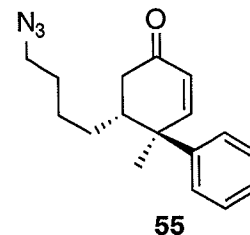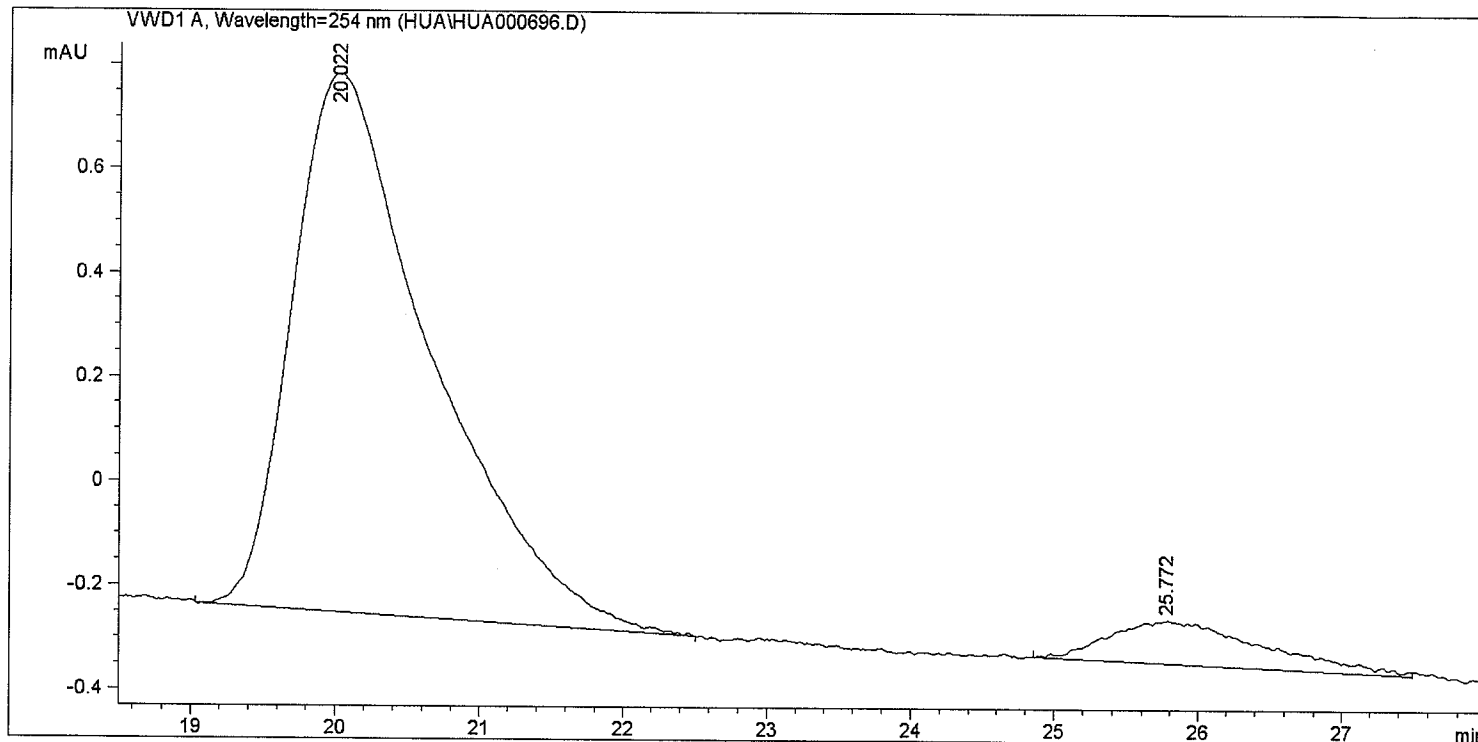

=====  
Fraction Information  
=====

Fraction collection off

No Fractions found.  
=====

=====  
Area Percent Report  
=====

```
Sorted By      :      Signal
Multiplier     :      1.0000
Dilution       :      1.0000
Use Multiplier & Dilution Factor with ISTDs
```

Signal 1: VWD1 A, Wavelength=254 nm

| Peak # | RetTime [min] | Type | Width [min] | Area mAU*s | Height [mAU] | Area %  |
|--------|---------------|------|-------------|------------|--------------|---------|
| 1      | 20.022        | BB   | 0.9779      | 69.17640   | 1.03490      | 91.4435 |
| 2      | 25.772        | BB   | 0.9416      | 6.47297    | 8.32908e-2   | 8.5565  |

=====

|                 |                                                         |            |          |
|-----------------|---------------------------------------------------------|------------|----------|
| Acq. Operator   | : HUA                                                   | Seq. Line  | : 1      |
| Acq. Instrument | : Instrument 1                                          | Location   | : Vial 1 |
| Injection Date  | : 1/26/2010 3:30:41 PM                                  | Inj        | : 1      |
|                 |                                                         | Inj Volume | : 5 µl   |
| Acq. Method     | : C:\CHEM32\1\METHODS\HUA.M                             |            |          |
| Last changed    | : 1/26/2010 10:15:56 AM by HUA                          |            |          |
| Analysis Method | : C:\CHEM32\1\METHODS\HUA.M                             |            |          |
| Last changed    | : 3/15/2010 8:05:19 PM by CHAO                          |            |          |
|                 | (modified after loading)                                |            |          |
| Method Info     | : ADanalytical column, 1.0 mL/min, 254 nm, IPA:HEX10:90 |            |          |

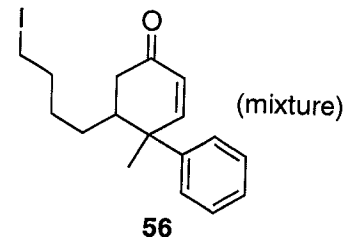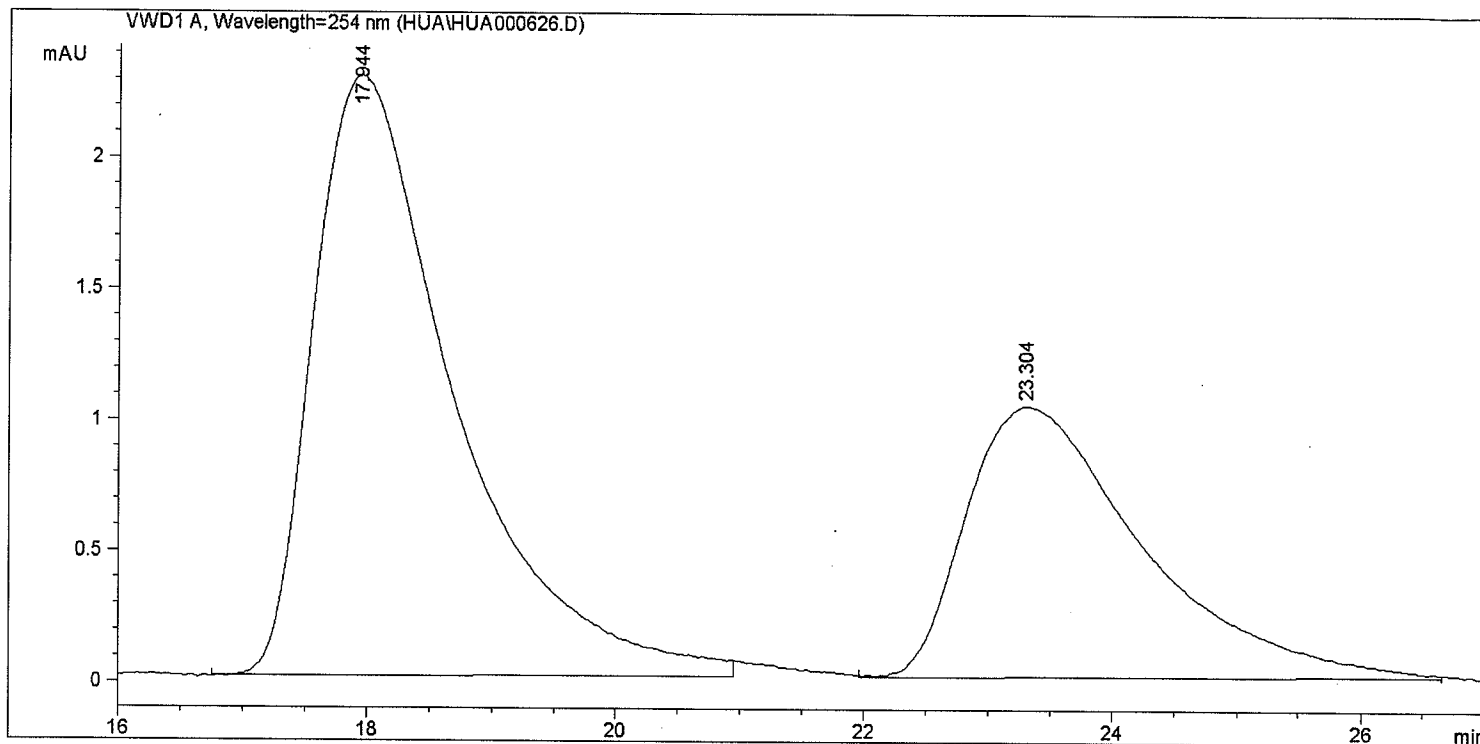

=====

Fraction Information

=====

Fraction collection off

No Fractions found.

=====

Area Percent Report

=====

Sorted By : Signal  
Multiplier : 1.0000  
Dilution : 1.0000  
Use Multiplier & Dilution Factor with ISTDs

Signal 1: VWD1 A, Wavelength=254 nm

| Peak # | RetTime [min] | Type | Width [min] | Area mAU *s | Height [mAU] | Area %  |
|--------|---------------|------|-------------|-------------|--------------|---------|
| 1      | 17.944        | BB   | 1.1702      | 180.53336   | 2.29001      | 63.8415 |
| 2      | 23.304        | BB   | 1.4738      | 102.25032   | 1.03419      | 36.1585 |

Sample Name: 15-28

```
=====
Acq. Operator   : HUA                      Seq. Line :    1
Acq. Instrument : Instrument 1              Location  : Vial 1
Injection Date  : 1/26/2010 2:26:55 PM      Inj       :    1
                                           Inj Volume: 5 µl

Acq. Method     : C:\CHEM32\1\METHODS\HUA.M
Last changed    : 1/26/2010 10:15:56 AM by HUA
Analysis Method : C:\CHEM32\1\METHODS\HUA.M
Last changed    : 3/15/2010 8:08:15 PM by CHAO
                  (modified after loading)

Method Info     : ADanalytical column, 1.0 mL/min, 254 nm, IPA:HEX10:90
=====
```

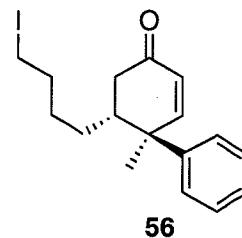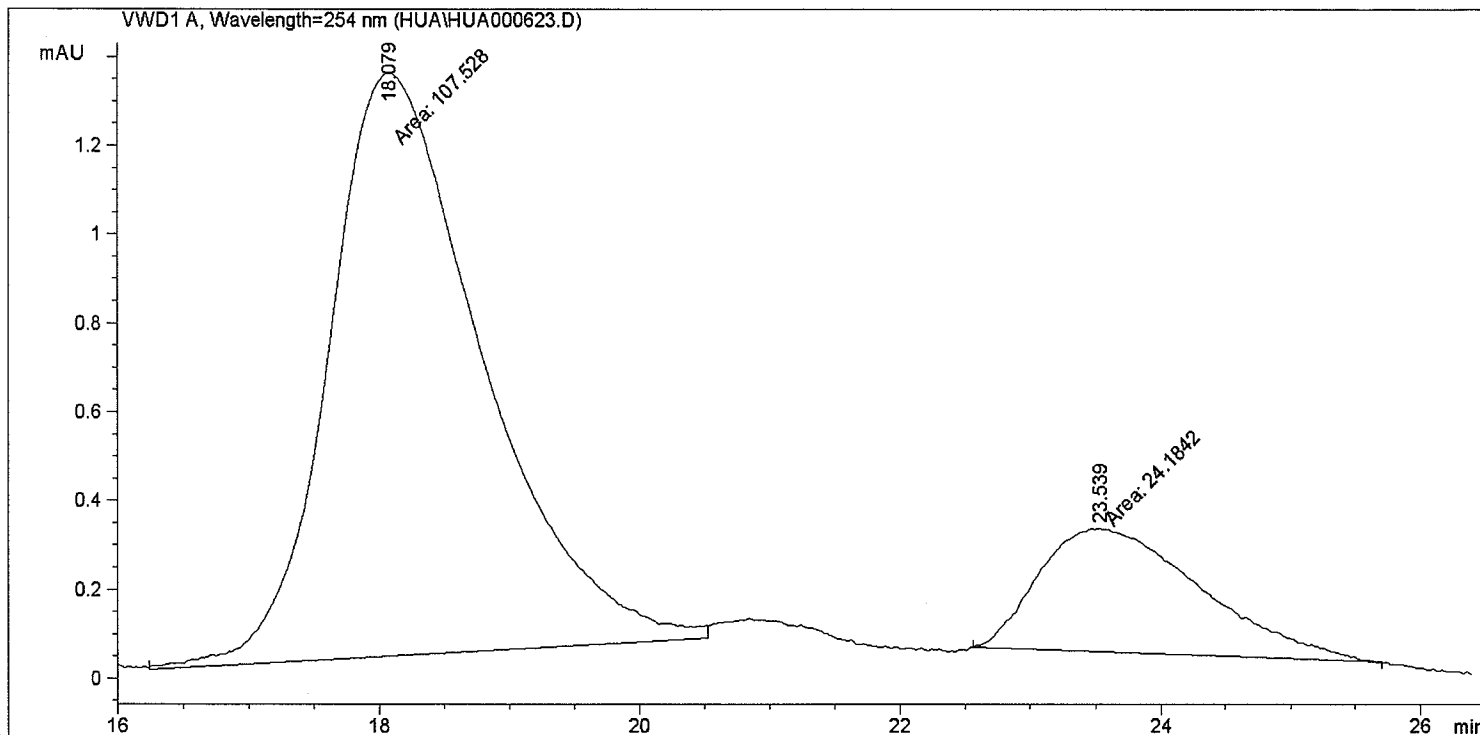

```
=====
Fraction Information
=====
```

Fraction collection off

No Fractions found.

```
=====
Area Percent Report
=====
```

```
Sorted By      :      Signal
Multiplier     :      1.0000
Dilution       :      1.0000
Use Multiplier & Dilution Factor with ISTDs
```

Signal 1: VWD1 A, Wavelength=254 nm

| Peak # | RetTime [min] | Type | Width [min] | Area mAU  | Height [mAU] | Area %  |
|--------|---------------|------|-------------|-----------|--------------|---------|
| 1      | 18.079        | MM   | 1.3631      | 107.52780 | 1.31470      | 81.6386 |
| 2      | 23.539        | MM   | 1.4510      | 24.18416  | 2.77785e-1   | 18.3614 |

Sample Name: 15-74mix

```

=====
Acq. Operator   : HUA                      Seq. Line :    1
Acq. Instrument : Instrument 1              Location  : Via
Injection Date  : 3/8/2010 3:19:33 PM      Inj       :    1
                                           Inj Volume: 5 µl

Acq. Method     : C:\CHEM32\1\METHODS\HUA.M
Last changed    : 3/8/2010 12:58:14 PM by HUA
Analysis Method : C:\CHEM32\1\METHODS\HUA.M
Last changed    : 3/15/2010 8:11:31 PM by CHAO
                  (modified after loading)

Method Info     : ADanalytical column, 1.0 mL/min, 254 nm, IPA:HEX10:90
=====

```

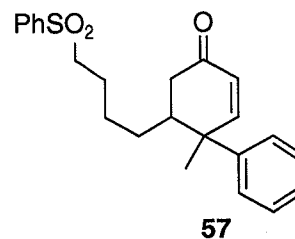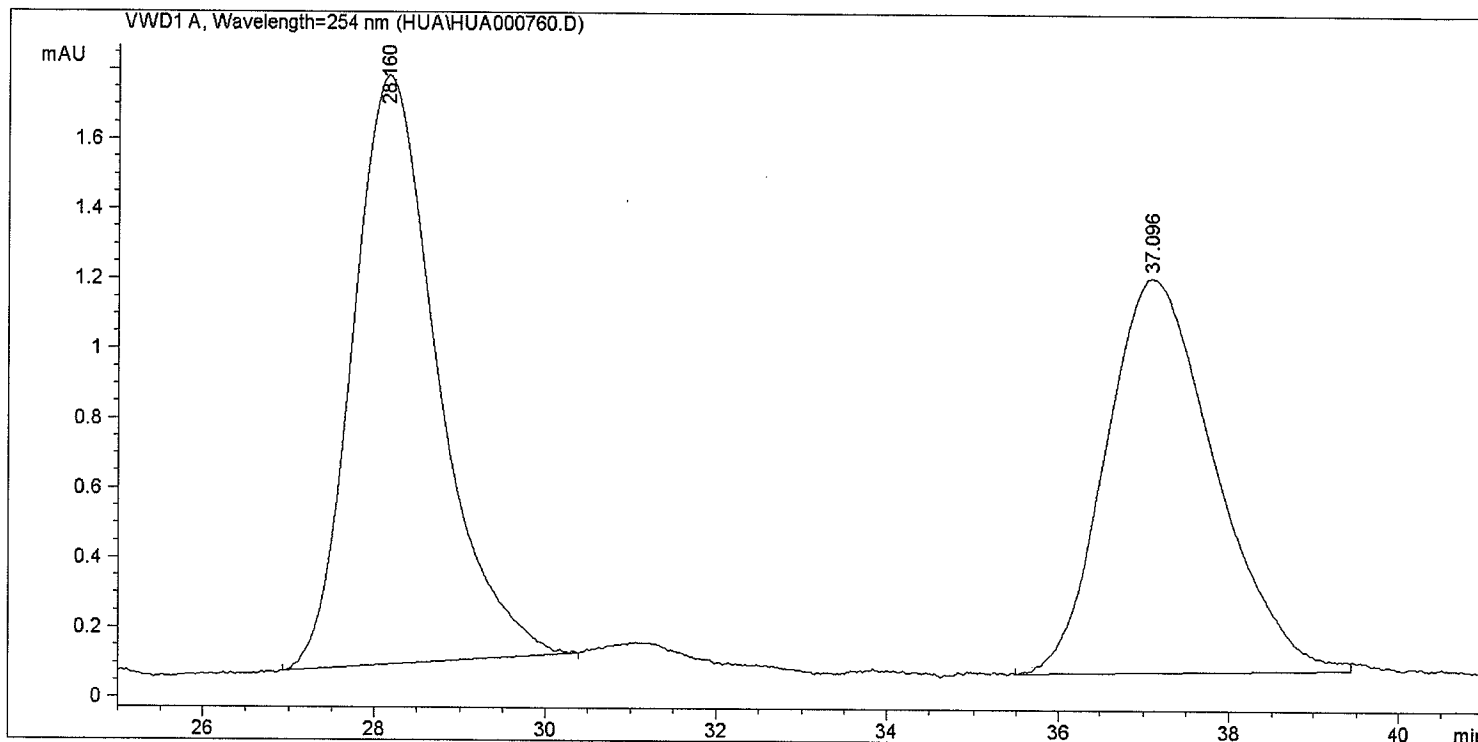

```

=====
Fraction Information
=====

```

Fraction collection off

No Fractions found.

```

=====
Area Percent Report
=====

```

```

Sorted By      :      Signal
Multiplier     :      1.0000
Dilution       :      1.0000
Use Multiplier & Dilution Factor with ISTDs

```

Signal 1: VWD1 A, Wavelength=254 nm

| Peak # | RetTime [min] | Type | Width [min] | Area mAU*s | Height [mAU] | Area %  |
|--------|---------------|------|-------------|------------|--------------|---------|
| 1      | 28.160        | BB   | 1.0432      | 115.56551  | 1.68831      | 53.4490 |
| 2      | 37.096        | BB   | 1.3400      | 100.65092  | 1.13221      | 46.5510 |

Sample Name: 15-74

```
=====
Acq. Operator   : HUA                               Seq. Line :    1
Acq. Instrument : Instrument 1                       Location  : Vial 1
Injection Date  : 3/8/2010 1:48:22 PM                 Inj       :    1
                                                    Inj Volume: 5 µl

Acq. Method     : C:\CHEM32\1\METHODS\HUA.M
Last changed    : 3/8/2010 12:58:14 PM by HUA
Analysis Method : C:\CHEM32\1\METHODS\HUA.M
Last changed    : 3/15/2010 8:12:56 PM by CHAO
                  (modified after loading)

Method Info     : ADanalytical column, 1.0 mL/min, 254 nm, IPA:HEX10:9.
=====
```

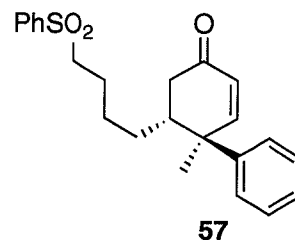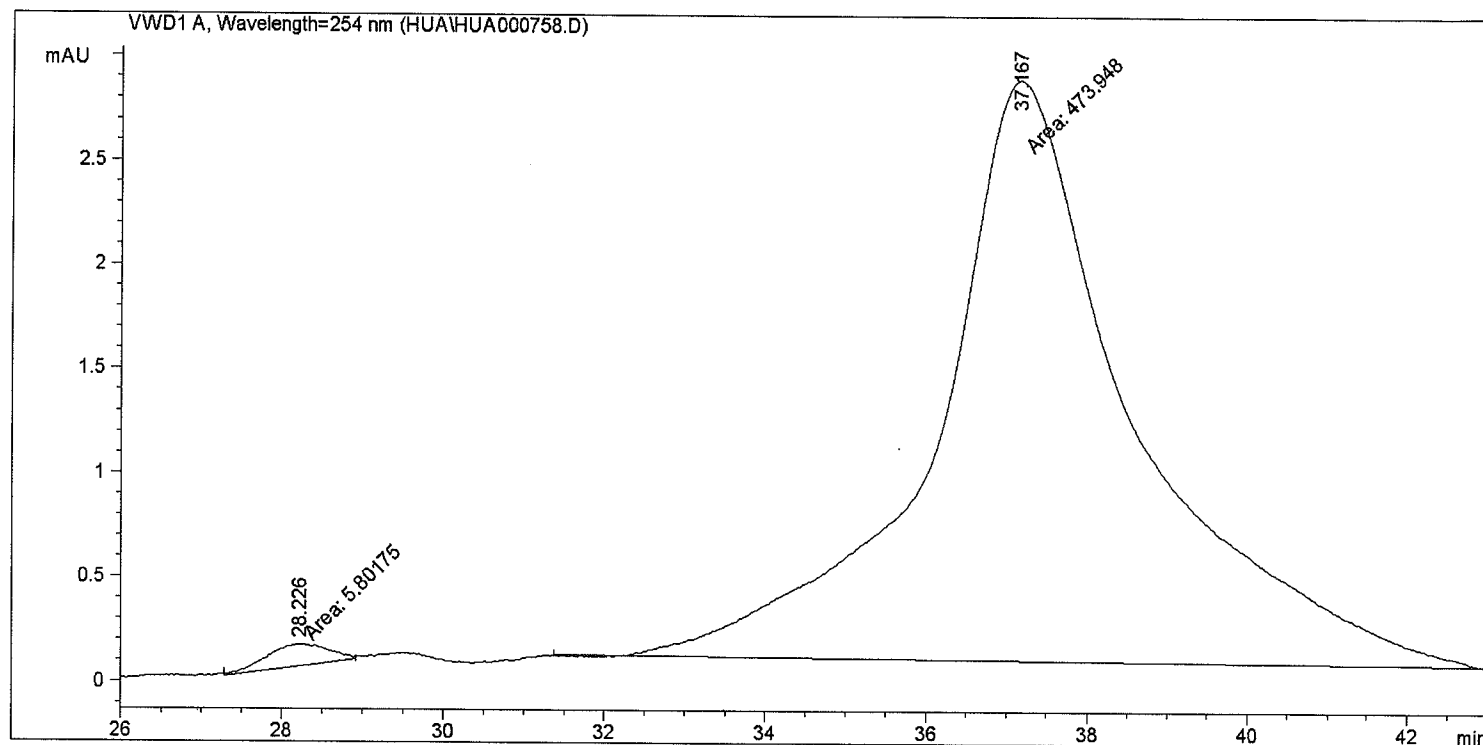

=====  
Fraction Information  
=====

Fraction collection off

No Fractions found.

=====  
Area Percent Report  
=====

```
Sorted By      :      Signal
Multiplier     :      1.0000
Dilution       :      1.0000
Use Multiplier & Dilution Factor with ISTDs
```

Signal 1: VWD1 A, Wavelength=254 nm

| Peak # | RetTime [min] | Type | Width [min] | Area mAU *s | Height [mAU] | Area %  |
|--------|---------------|------|-------------|-------------|--------------|---------|
| 1      | 28.226        | MM   | 0.9045      | 5.80175     | 1.06906e-1   | 1.2093  |
| 2      | 37.167        | MM   | 2.8347      | 473.94778   | 2.78656      | 98.7907 |

=====

|                 |                                                  |            |      |
|-----------------|--------------------------------------------------|------------|------|
| Acq. Operator   | : HUA                                            | Seq. Line  | :    |
| Acq. Instrument | : Instrument 1                                   | Location   | : Vi |
| Injection Date  | : 2/24/2010 12:43:27 PM                          | Inj        | :    |
|                 |                                                  | Inj Volume | : 5  |
| Acq. Method     | : C:\CHEM32\1\METHODS\HUA.M                      |            |      |
| Last changed    | : 2/24/2010 12:41:26 PM by HUA                   |            |      |
| Analysis Method | : C:\CHEM32\1\METHODS\HUA.M                      |            |      |
| Last changed    | : 3/15/2010 8:15:26 PM by CHAO                   |            |      |
|                 | (modified after loading)                         |            |      |
| Method Info     | : ADanalytical column, 1.0 mL/min, 254 nm, IPA:1 |            |      |

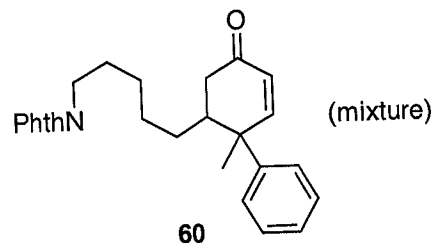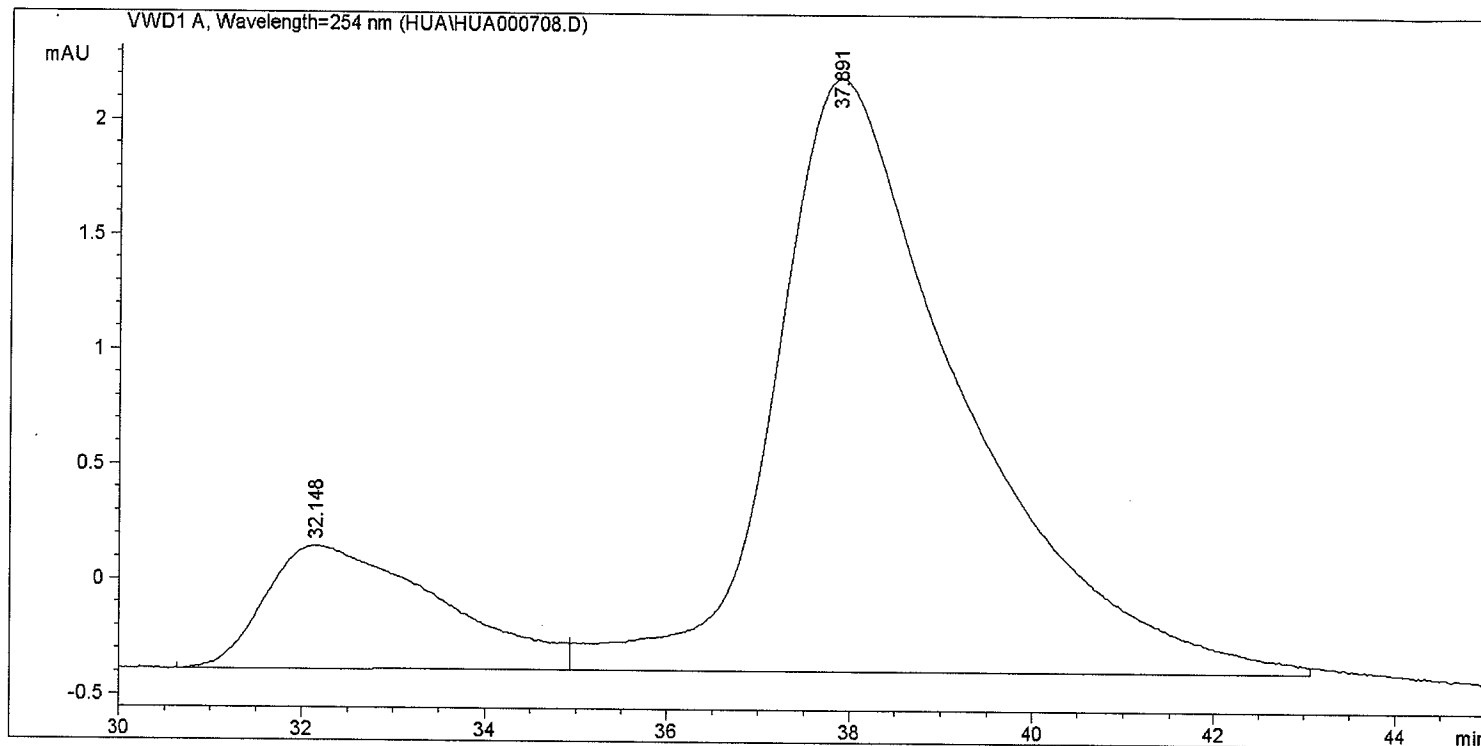

=====

Fraction Information

=====

Fraction collection off

No Fractions found.

=====

Area Percent Report

=====

Sorted By : Signal  
Multiplier : 1.0000  
Dilution : 1.0000  
Use Multiplier & Dilution Factor with ISTDs

Signal 1: VWD1 A, Wavelength=254 nm

| Peak # | RetTime [min] | Type | Width [min] | Area mAU *s | Height [mAU] | Area %  |
|--------|---------------|------|-------------|-------------|--------------|---------|
| 1      | 32.148        | BV   | 1.7805      | 71.41869    | 5.36379e-1   | 16.1952 |
| 2      | 37.891        | VB   | 2.0134      | 369.56851   | 2.58213      | 83.8048 |

Sample Name: 15-62

```

=====
Acq. Operator   : HUA                      Seq. Line :    1
Acq. Instrument : Instrument 1              Location  : Vial 1
Injection Date  : 2/24/2010 2:59:32 PM      Inj       :    1
                                           Inj Volume: 5 µl

Acq. Method     : C:\CHEM32\1\METHODS\HUA.M
Last changed    : 2/24/2010 1:53:42 PM by HUA
Analysis Method : C:\CHEM32\1\METHODS\HUA.M
Last changed    : 3/15/2010 8:20:41 PM by CHAO
                  (modified after loading)

Method Info     : ADanalytical column, 1.0 mL/min, 254 nm, IPA:HEX10:90
=====

```

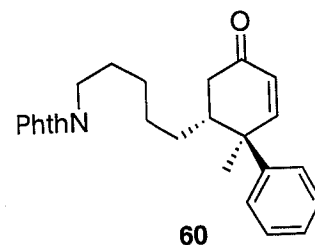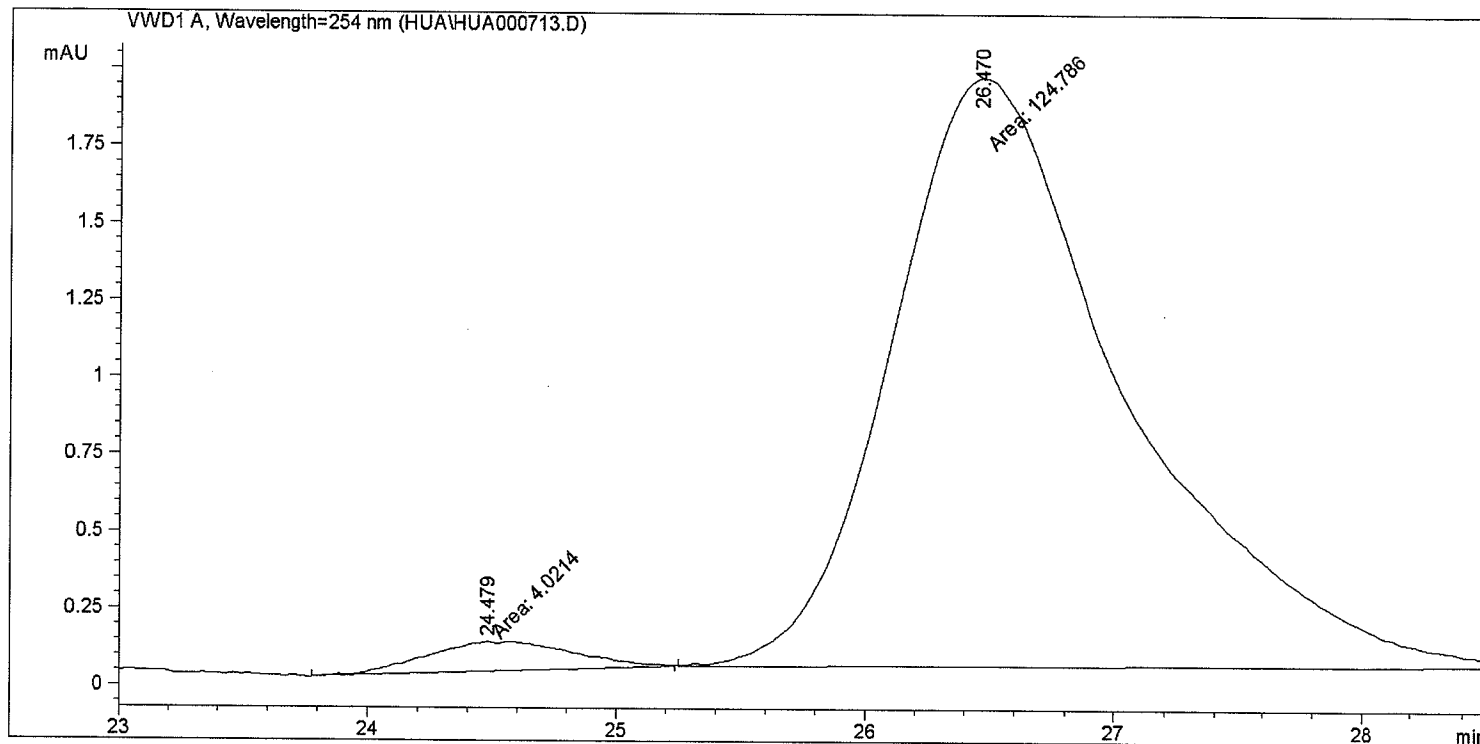

```

=====
Fraction Information
=====

```

Fraction collection off

No Fractions found.

```

=====
Area Percent Report
=====

```

```

Sorted By      : Signal
Multiplier     : 1.0000
Dilution       : 1.0000
Use Multiplier & Dilution Factor with ISTDs

```

Signal 1: VWD1 A, Wavelength=254 nm

| Peak # | RetTime [min] | Type | Width [min] | Area mAU *s | Height [mAU] | Area %  |
|--------|---------------|------|-------------|-------------|--------------|---------|
| 1      | 24.479        | MM   | 0.6863      | 4.02140     | 9.76536e-2   | 3.1220  |
| 2      | 26.470        | MM   | 1.0887      | 124.78558   | 1.91027      | 96.8780 |



Sample Name: 15-22 mix

```

=====
Acq. Operator   : HUA                      Seq. Line :    1
Acq. Instrument : Instrument 1              Location  : Vial 1
Injection Date  : 1/14/2010 10:40:29 AM    Inj       :    1
                                           Inj Volume: 5 µl

Acq. Method     : C:\CHEM32\1\METHODS\HUA.M
Last changed    : 1/14/2010 10:38:37 AM by HUA
Analysis Method : C:\CHEM32\1\METHODS\HUA.M
Last changed    : 3/15/2010 8:20:56 PM by CHAO
                  (modified after loading)

Method Info     : ADanalytical column, 1.0 mL/min, 254 nm, IPA:HEX10:90
=====

```

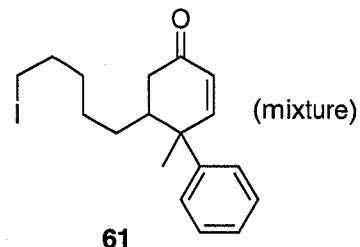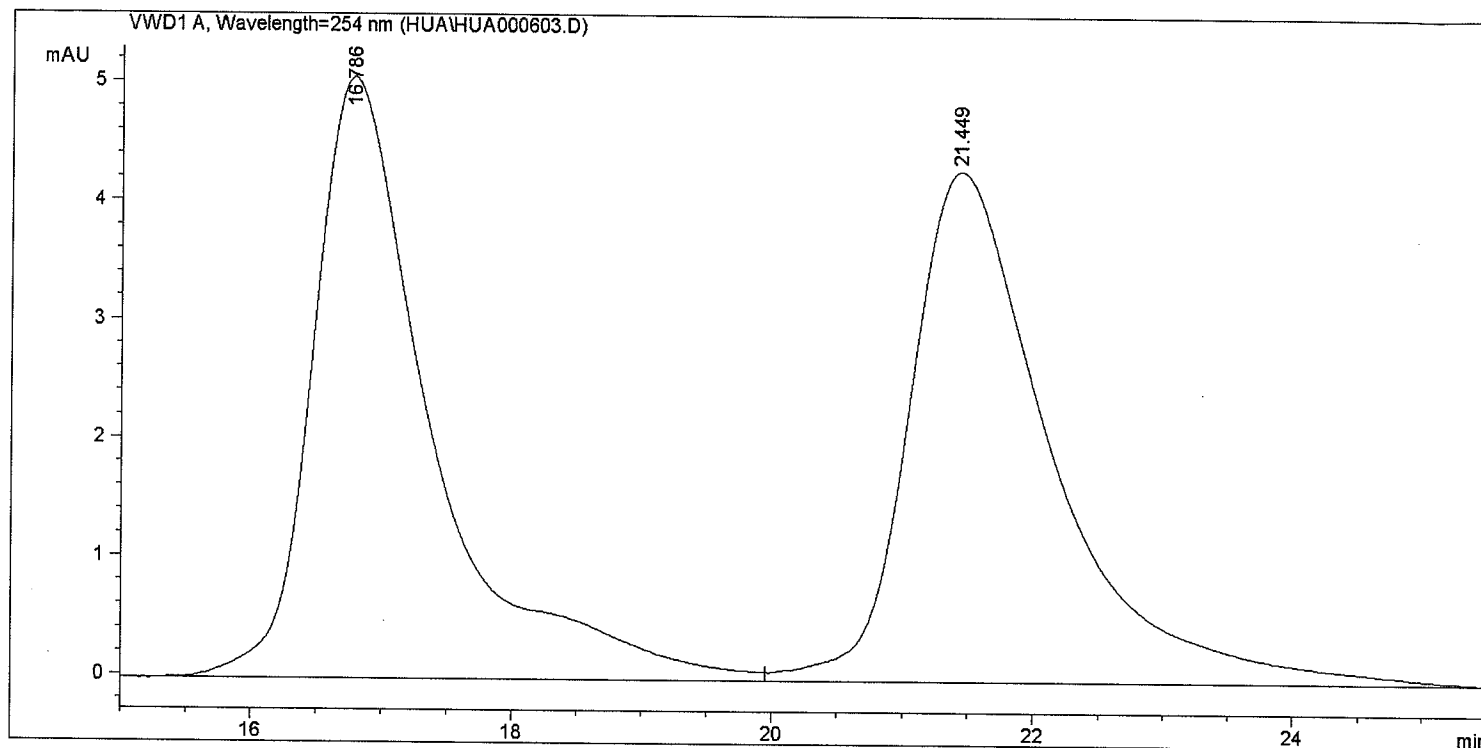

```

=====
Fraction Information
=====

```

```

Fraction collection off
=====

```

```

No Fractions found.
=====

```

```

=====
Area Percent Report
=====

```

```

Sorted By      : Signal
Multiplier     : 1.0000
Dilution       : 1.0000
Use Multiplier & Dilution Factor with ISTDs

```

Signal 1: VWD1 A, Wavelength=254 nm

| Peak # | RetTime [min] | Type | Width [min] | Area mAU *s | Height [mAU] | Area %  |
|--------|---------------|------|-------------|-------------|--------------|---------|
| 1      | 16.786        | VV   | 0.9288      | 322.69986   | 5.07094      | 49.5812 |
| 2      | 21.449        | VB   | 1.1220      | 328.15085   | 4.30616      | 50.4188 |

Sample Name: 15-22

```

=====
Acq. Operator   : HUA                      Seq. Line :    1
Acq. Instrument : Instrument 1              Location  : Vial 1
Injection Date  : 1/14/2010 11:12:28 AM    Inj       :    1
                                           Inj Volume: 5 µl

Acq. Method     : C:\CHEM32\1\METHODS\HUA.M
Last changed    : 1/14/2010 10:38:37 AM by HUA
Analysis Method : C:\CHEM32\1\METHODS\HUA.M
Last changed    : 3/15/2010 8:24:36 PM by CHAO
                  (modified after loading)

Method Info     : ADanalytical column, 1.0 mL/min, 254 nm, IPA:HEX10:90
=====

```

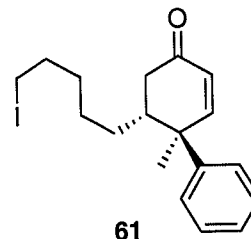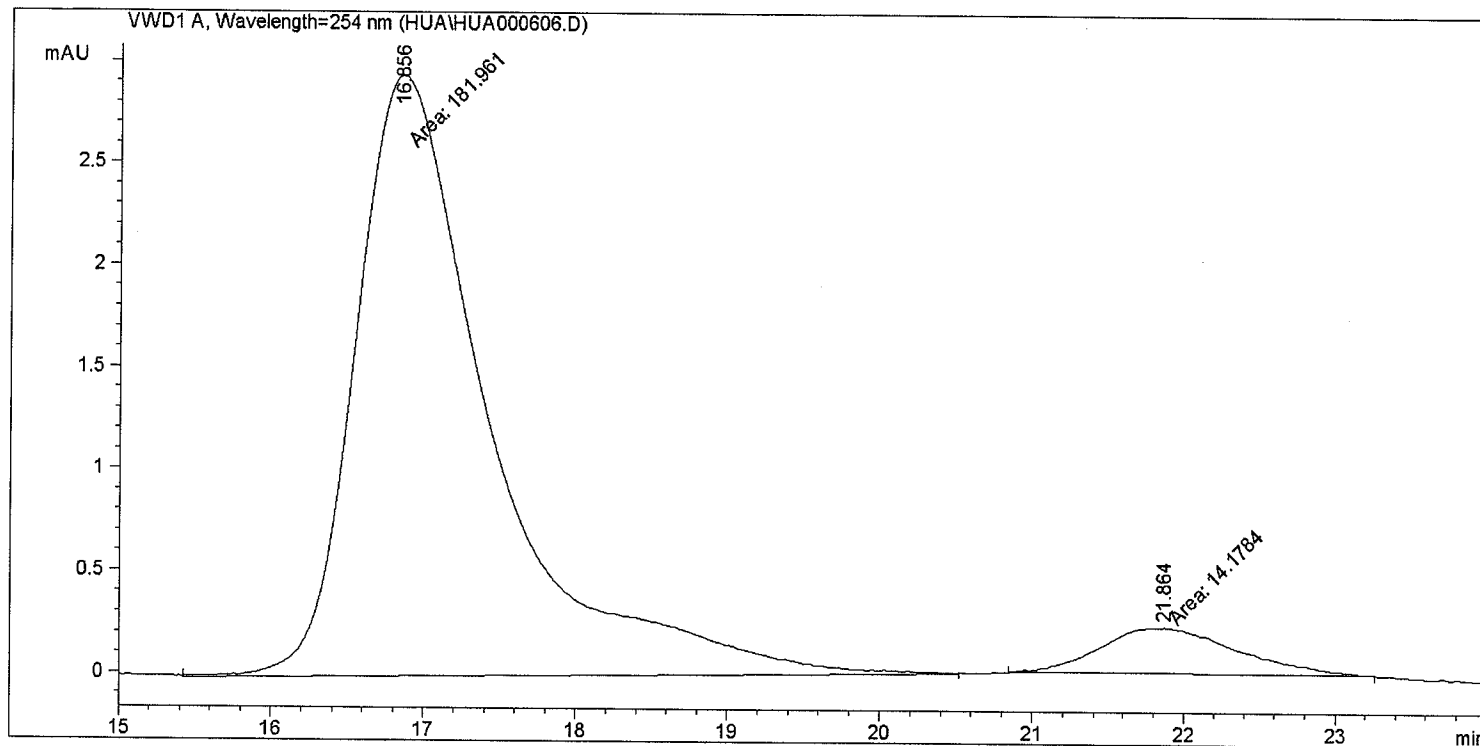

```

=====
Fraction Information
=====

```

```

=====
Fraction collection off
=====

```

```

=====
No Fractions found.
=====

```

```

=====
Area Percent Report
=====

```

```

Sorted By      : Signal
Multiplier     : 1.0000
Dilution       : 1.0000
Use Multiplier & Dilution Factor with ISTDs

```

Signal 1: VWD1 A, Wavelength=254 nm

| Peak # | RetTime [min] | Type | Width [min] | Area mAU *s | Height [mAU] | Area %  |
|--------|---------------|------|-------------|-------------|--------------|---------|
| 1      | 16.856        | MM   | 1.0277      | 181.96082   | 2.95105      | 92.7713 |
| 2      | 21.864        | MM   | 1.0560      | 14.17836    | 2.23772e-1   | 7.2287  |
